# Supplementary material for: Discovery of Trypanosomatid Parasites in Globally Distributed Drosophila Species
Source: PLoS One. 2013 Apr 29;8(4):e61937. doi: 10.1371/journal.pone.0061937 (PMC3639215; doi:10.1371/journal.pone.0061937)
Supplement: Dataset S2 — Primer Sequences. (XLSX) [file pone.0061937.s002.xlsx]

## Sheet: Sheet2
Dataset S2: Primer Sequences
Primers used in 454 sequencing run
Full Primer Sequence	Adaptor A	Key	6-bp barcode	NL1 Sequence
CCATCTCATCCCTGCGTGTCTCCGACTCAGACACACGCATATCAATAAGCGGAGGAAAAG	CCATCTCATCCCTGCGTGTCTCCGAC	TCAG	ACACAC	GCATATCAATAAGCGGAGGAAAAG
CCATCTCATCCCTGCGTGTCTCCGACTCAGACGACTGCATATCAATAAGCGGAGGAAAAG	CCATCTCATCCCTGCGTGTCTCCGAC	TCAG	ACGACT	GCATATCAATAAGCGGAGGAAAAG
CCATCTCATCCCTGCGTGTCTCCGACTCAGACGTCAGCATATCAATAAGCGGAGGAAAAG	CCATCTCATCCCTGCGTGTCTCCGAC	TCAG	ACGTCA	GCATATCAATAAGCGGAGGAAAAG
CCATCTCATCCCTGCGTGTCTCCGACTCAGACTCTCGCATATCAATAAGCGGAGGAAAAG	CCATCTCATCCCTGCGTGTCTCCGAC	TCAG	ACTCTC	GCATATCAATAAGCGGAGGAAAAG
CCATCTCATCCCTGCGTGTCTCCGACTCAGAGACTCGCATATCAATAAGCGGAGGAAAAG	CCATCTCATCCCTGCGTGTCTCCGAC	TCAG	AGACTC	GCATATCAATAAGCGGAGGAAAAG
CCATCTCATCCCTGCGTGTCTCCGACTCAGAGCACTGCATATCAATAAGCGGAGGAAAAG	CCATCTCATCCCTGCGTGTCTCCGAC	TCAG	AGCACT	GCATATCAATAAGCGGAGGAAAAG
CCATCTCATCCCTGCGTGTCTCCGACTCAGAGCTCAGCATATCAATAAGCGGAGGAAAAG	CCATCTCATCCCTGCGTGTCTCCGAC	TCAG	AGCTCA	GCATATCAATAAGCGGAGGAAAAG
CCATCTCATCCCTGCGTGTCTCCGACTCAGAGTCACGCATATCAATAAGCGGAGGAAAAG	CCATCTCATCCCTGCGTGTCTCCGAC	TCAG	AGTCAC	GCATATCAATAAGCGGAGGAAAAG
CCATCTCATCCCTGCGTGTCTCCGACTCAGCAGATCGCATATCAATAAGCGGAGGAAAAG	CCATCTCATCCCTGCGTGTCTCCGAC	TCAG	CAGATC	GCATATCAATAAGCGGAGGAAAAG
CCATCTCATCCCTGCGTGTCTCCGACTCAGCATCGAGCATATCAATAAGCGGAGGAAAAG	CCATCTCATCCCTGCGTGTCTCCGAC	TCAG	CATCGA	GCATATCAATAAGCGGAGGAAAAG
CCATCTCATCCCTGCGTGTCTCCGACTCAGCATGGTGCATATCAATAAGCGGAGGAAAAG	CCATCTCATCCCTGCGTGTCTCCGAC	TCAG	CATGGT	GCATATCAATAAGCGGAGGAAAAG
CCATCTCATCCCTGCGTGTCTCCGACTCAGCTACGAGCATATCAATAAGCGGAGGAAAAG	CCATCTCATCCCTGCGTGTCTCCGAC	TCAG	CTACGA	GCATATCAATAAGCGGAGGAAAAG
CCATCTCATCCCTGCGTGTCTCCGACTCAGCTCATCGCATATCAATAAGCGGAGGAAAAG	CCATCTCATCCCTGCGTGTCTCCGAC	TCAG	CTCATC	GCATATCAATAAGCGGAGGAAAAG
CCATCTCATCCCTGCGTGTCTCCGACTCAGTCACTCGCATATCAATAAGCGGAGGAAAAG	CCATCTCATCCCTGCGTGTCTCCGAC	TCAG	TCACTC	GCATATCAATAAGCGGAGGAAAAG
CCATCTCATCCCTGCGTGTCTCCGACTCAGTCGACAGCATATCAATAAGCGGAGGAAAAG	CCATCTCATCCCTGCGTGTCTCCGAC	TCAG	TCGACA	GCATATCAATAAGCGGAGGAAAAG
CCATCTCATCCCTGCGTGTCTCCGACTCAGTCGTCTGCATATCAATAAGCGGAGGAAAAG	CCATCTCATCCCTGCGTGTCTCCGAC	TCAG	TCGTCT	GCATATCAATAAGCGGAGGAAAAG
CCATCTCATCCCTGCGTGTCTCCGACTCAGTCTCACGCATATCAATAAGCGGAGGAAAAG	CCATCTCATCCCTGCGTGTCTCCGAC	TCAG	TCTCAC	GCATATCAATAAGCGGAGGAAAAG
CCATCTCATCCCTGCGTGTCTCCGACTCAGTGACACGCATATCAATAAGCGGAGGAAAAG	CCATCTCATCCCTGCGTGTCTCCGAC	TCAG	TGACAC	GCATATCAATAAGCGGAGGAAAAG
CCATCTCATCCCTGCGTGTCTCCGACTCAGTGCACAGCATATCAATAAGCGGAGGAAAAG	CCATCTCATCCCTGCGTGTCTCCGAC	TCAG	TGCACA	GCATATCAATAAGCGGAGGAAAAG
CCATCTCATCCCTGCGTGTCTCCGACTCAGTGCTCTGCATATCAATAAGCGGAGGAAAAG	CCATCTCATCCCTGCGTGTCTCCGAC	TCAG	TGCTCT	GCATATCAATAAGCGGAGGAAAAG
CCATCTCATCCCTGCGTGTCTCCGACTCAGTGTCTCGCATATCAATAAGCGGAGGAAAAG	CCATCTCATCCCTGCGTGTCTCCGAC	TCAG	TGTCTC	GCATATCAATAAGCGGAGGAAAAG
Full Primer Sequence	AdaptorB	Key	barcode	NL4 Sequence
CCTATCCCCTGTGTGCCTTGGCAGTCTCAGGGTCCGTGTTTCAAGACGG	CCTATCCCCTGTGTGCCTTGGCAGTC	TCAG	(no barcode on reverse primer)	GGTCCGTGTTTCAAGACGG
Primers used in SSU sanger sequencing
SSU1	GACTTTTGCTTCCTCTA(A/T)TG
SSU2	CATATGCTTGTTTCAAGGAC
SSU_Mid_55	TAAAGAAATTGACGGAATGG
SSU_Mid_60	GCGTGCGGTTTAATTTGACT
SSU_End_58	TCCCATGCTT(T/G)CTAATTCAA
SSU_End_55	CCCATGCTT(T/G)CTAATTCAAG
SSU_FarEnd_53	TCACACTT(C/T)TTTAGTCACAGT
Primers used to identify Drosophila
COII_F_tLEU	ATGGCAGATTAGTGCAATGG
COII_R_tLYS	GTTTAAGAGACCAGTACTTG
SL Primers
SLF	TTCTGTACT(A/T)TATTGGTA
SLR	AATA(A/T)AGTACAGAAACTG
