# Supplementary material for: Discovery of Trypanosomatid Parasites in Globally Distributed Drosophila Species
Source: PLoS One. 2013 Apr 29;8(4):e61937. doi: 10.1371/journal.pone.0061937 (PMC3639215; doi:10.1371/journal.pone.0061937)
Supplement: Dataset S4 — Detailed OTU information at the 0% divergence cutoff. This excel file contains the OTU assigned to each sequence used in this study along with information regarding the host species, location, environment, and other information regarding the library each sequence belongs to. (XLSX) [file pone.0061937.s004.xlsx]

## Sheet: Pivot
Sum of Count	Column Labels
Row Labels	ANM	ELA	ELD	FNS	ICF	IMH	MEC	MIC	MOV	NNS	POM	PON	SCA	SPP	TKM	Grand Total
92	13						1								78	92
58						56	1					1				58
55	8														47	55
45											45					45
44											44					44
41		24	1				15								1	41
31	3														28	31
15											15					15
14						14										14
9.3											9					9
9.2		6					3									9
9.1					9											9
8.2						8										8
8.1		4		1			3									8
6.2					5					1						6
6.1															6	6
5.4											5					5
5.3															5	5
5.2											5					5
5.1							5									5
4.3						4										4
4.2				4												4
4.1								4								4
3.6					3											3
3.5											3					3
3.4		3														3
3.3											3					3
3.2											3					3
3.1					2					1						3
2.9															2	2
2.8						2										2
2.7											2					2
2.6												2				2
2.5					2											2
2.4		2														2
2.31	1														1	2
2.3					2											2
2.3											2					2
2.2	1														1	2
2.19															2	2
2.18				2												2
2.17						2										2
2.16															2	2
2.15											2					2
2.14					2											2
2.13											2					2
2.12															2	2
2.11											2					2
2.1		1					1									2
1.365				1												1
1.364					1											1
1.363						1										1
1.362						1										1
1.361						1										1
1.36											1					1
1.359								1								1
1.358											1					1
1.357											1					1
1.356															1	1
1.355									1							1
1.354															1	1
1.353								1								1
1.352											1					1
1.351					1											1
1.35						1										1
1.349															1	1
1.348						1										1
1.347											1					1
1.346		1														1
1.345		1														1
1.344											1					1
1.343															1	1
1.342						1										1
1.341											1					1
1.34									1							1
1.339															1	1
1.338					1											1
1.337					1											1
1.336						1										1
1.335															1	1
1.334															1	1
1.333															1	1
1.332															1	1
1.331					1											1
1.33											1					1
1.329															1	1
1.328											1					1
1.327						1										1
1.326															1	1
1.325											1					1
1.324															1	1
1.323															1	1
1.322											1					1
1.321															1	1
1.32											1					1
1.319						1										1
1.318											1					1
1.317											1					1
1.316						1										1
1.315											1					1
1.314					1											1
1.313							1									1
1.312					1											1
1.311											1					1
1.31							1									1
1.309											1					1
1.308	1															1
1.307		1														1
1.306															1	1
1.305		1														1
1.304															1	1
1.303											1					1
1.302											1					1
1.301															1	1
1.3															1	1
1.299															1	1
1.298															1	1
1.297						1										1
1.296											1					1
1.295		1														1
1.294													1			1
1.293		1														1
1.292									1							1
1.291							1									1
1.29					1											1
1.289	1															1
1.288		1														1
1.287															1	1
1.286											1					1
1.285											1					1
1.284															1	1
1.283											1					1
1.282											1					1
1.281															1	1
1.28								1								1
1.279				1												1
1.278							1									1
1.277					1											1
1.276				1												1
1.275											1					1
1.274							1									1
1.273		1														1
1.272							1									1
1.271											1					1
1.27						1										1
1.269					1											1
1.268															1	1
1.267															1	1
1.266															1	1
1.265			1													1
1.264											1					1
1.263											1					1
1.262															1	1
1.261															1	1
1.26											1					1
1.259											1					1
1.258															1	1
1.257															1	1
1.256															1	1
1.255															1	1
1.254															1	1
1.253											1					1
1.252															1	1
1.251															1	1
1.25		1														1
1.249						1										1
1.248									1							1
1.247															1	1
1.246	1															1
1.245							1									1
1.244						1										1
1.243															1	1
1.242		1														1
1.241											1					1
1.24															1	1
1.239											1					1
1.238									1							1
1.237											1					1
1.236															1	1
1.235															1	1
1.234											1					1
1.233	1															1
1.232											1					1
1.231											1					1
1.23															1	1
1.229															1	1
1.228															1	1
1.227															1	1
1.226											1					1
1.225									1							1
1.224		1														1
1.223													1			1
1.222															1	1
1.221															1	1
1.22															1	1
1.219															1	1
1.218					1											1
1.217															1	1
1.216						1										1
1.215															1	1
1.214															1	1
1.213						1										1
1.212						1										1
1.211					1											1
1.21						1										1
1.209											1					1
1.208															1	1
1.207		1														1
1.206		1														1
1.205							1									1
1.204															1	1
1.203															1	1
1.202															1	1
1.201							1									1
1.2											1					1
1.199		1														1
1.198						1										1
1.197											1					1
1.196							1									1
1.195											1					1
1.194											1					1
1.193							1									1
1.192						1										1
1.191											1					1
1.19					1											1
1.189				1												1
1.188															1	1
1.187					1											1
1.186				1												1
1.185											1					1
1.184	1															1
1.183	1															1
1.182															1	1
1.181															1	1
1.18															1	1
1.179															1	1
1.178					1											1
1.177															1	1
1.176															1	1
1.175											1					1
1.174					1											1
1.173															1	1
1.172															1	1
1.171						1										1
1.17											1					1
1.169											1					1
1.168					1											1
1.167											1					1
1.166															1	1
1.165											1					1
1.164															1	1
1.163		1														1
1.162															1	1
1.161					1											1
1.16											1					1
1.159											1					1
1.158					1											1
1.157															1	1
1.156						1										1
1.155				1												1
1.154											1					1
1.153					1											1
1.152		1														1
1.151															1	1
1.15											1					1
1.149														1		1
1.148															1	1
1.147															1	1
1.146		1														1
1.145															1	1
1.144						1										1
1.143						1										1
1.142															1	1
1.141											1					1
1.14											1					1
1.139															1	1
1.138				1												1
1.137											1					1
1.136	1															1
1.135											1					1
1.134															1	1
1.133															1	1
1.132															1	1
1.131															1	1
1.13						1										1
1.129					1											1
1.128															1	1
1.127											1					1
1.126						1										1
1.125															1	1
1.124															1	1
1.123												1				1
1.122	1															1
1.121															1	1
1.12															1	1
1.119															1	1
1.118				1												1
1.117	1															1
1.116				1												1
1.115											1					1
1.114															1	1
1.113															1	1
1.112															1	1
1.111															1	1
1.11															1	1
1.109															1	1
1.108											1					1
1.107											1					1
1.106															1	1
1.105											1					1
1.104											1					1
1.103															1	1
1.102															1	1
1.101		1														1
1.1											1					1
1.099											1					1
1.098											1					1
1.097			1													1
1.096															1	1
1.095					1											1
1.094											1					1
1.093							1									1
1.092						1										1
1.091											1					1
1.09															1	1
1.089									1							1
1.088															1	1
1.087						1										1
1.086											1					1
1.085						1										1
1.084					1											1
1.083					1											1
1.082						1										1
1.081											1					1
1.08											1					1
1.079											1					1
1.078	1															1
1.077						1										1
1.076											1					1
1.075					1											1
1.074											1					1
1.073											1					1
1.072															1	1
1.071						1										1
1.07															1	1
1.069															1	1
1.068															1	1
1.067															1	1
1.066															1	1
1.065											1					1
1.064											1					1
1.063						1										1
1.062											1					1
1.061											1					1
1.06															1	1
1.059						1										1
1.058						1										1
1.057											1					1
1.056						1										1
1.055								1								1
1.054						1										1
1.053											1					1
1.052						1										1
1.051															1	1
1.05											1					1
1.049											1					1
1.048							1									1
1.047							1									1
1.046				1												1
1.045															1	1
1.044						1										1
1.043															1	1
1.042							1									1
1.041											1					1
1.04		1														1
1.039											1					1
1.038															1	1
1.037		1														1
1.036															1	1
1.035									1							1
1.034															1	1
1.033					1											1
1.032															1	1
1.031															1	1
1.03				1												1
1.029										1						1
1.028											1					1
1.027												1				1
1.026		1														1
1.025															1	1
1.024													1			1
1.023		1														1
1.022											1					1
1.021											1					1
1.02															1	1
1.019							1									1
1.018											1					1
1.017											1					1
1.016															1	1
1.015						1										1
1.014		1														1
1.013									1							1
1.012					1											1
1.011							1									1
1.01															1	1
1.009					1											1
1.008		1														1
1.007					1											1
1.006											1					1
1.005											1					1
1.004						1										1
1.003		1														1
1.002					1											1
1.001											1					1
Grand Total	36	65	3	18	55	127	46	8	9	3	236	5	3	1	290	905

## Sheet: Data
Taxonomy	SeqID	Library	Species	Diet(sp)	Diet(br)	Location(sp)	Location(Br)	Count
92	ANM_4230	ANM	D. ananassae	Morinda	Fruit	Captain Cook	Hawaii	1
92	TKM_2578	TKM	D. takahashii	Morinda	Fruit	Captain Cook	Hawaii	1
92	TKM_4610	TKM	D. takahashii	Morinda	Fruit	Captain Cook	Hawaii	1
92	ANM_1262	ANM	D. ananassae	Morinda	Fruit	Captain Cook	Hawaii	1
92	TKM_4293	TKM	D. takahashii	Morinda	Fruit	Captain Cook	Hawaii	1
92	TKM_2847	TKM	D. takahashii	Morinda	Fruit	Captain Cook	Hawaii	1
92	TKM_3783	TKM	D. takahashii	Morinda	Fruit	Captain Cook	Hawaii	1
92	TKM_901	TKM	D. takahashii	Morinda	Fruit	Captain Cook	Hawaii	1
92	TKM_4788	TKM	D. takahashii	Morinda	Fruit	Captain Cook	Hawaii	1
92	TKM_2903	TKM	D. takahashii	Morinda	Fruit	Captain Cook	Hawaii	1
92	ANM_2581	ANM	D. ananassae	Morinda	Fruit	Captain Cook	Hawaii	1
92	TKM_1531	TKM	D. takahashii	Morinda	Fruit	Captain Cook	Hawaii	1
92	TKM_3364	TKM	D. takahashii	Morinda	Fruit	Captain Cook	Hawaii	1
92	TKM_874	TKM	D. takahashii	Morinda	Fruit	Captain Cook	Hawaii	1
92	TKM_4496	TKM	D. takahashii	Morinda	Fruit	Captain Cook	Hawaii	1
92	TKM_686	TKM	D. takahashii	Morinda	Fruit	Captain Cook	Hawaii	1
92	TKM_4579	TKM	D. takahashii	Morinda	Fruit	Captain Cook	Hawaii	1
92	TKM_3791	TKM	D. takahashii	Morinda	Fruit	Captain Cook	Hawaii	1
92	ANM_3431	ANM	D. ananassae	Morinda	Fruit	Captain Cook	Hawaii	1
92	ANM_1253	ANM	D. ananassae	Morinda	Fruit	Captain Cook	Hawaii	1
92	TKM_4722	TKM	D. takahashii	Morinda	Fruit	Captain Cook	Hawaii	1
92	TKM_3087	TKM	D. takahashii	Morinda	Fruit	Captain Cook	Hawaii	1
92	TKM_4111	TKM	D. takahashii	Morinda	Fruit	Captain Cook	Hawaii	1
92	TKM_1022	TKM	D. takahashii	Morinda	Fruit	Captain Cook	Hawaii	1
92	TKM_3946	TKM	D. takahashii	Morinda	Fruit	Captain Cook	Hawaii	1
92	MEC_2974	MEC	D. malerkotliana	Terminalia	Fruit	Seychelles	Africa	1
92	TKM_1301	TKM	D. takahashii	Morinda	Fruit	Captain Cook	Hawaii	1
92	TKM_630	TKM	D. takahashii	Morinda	Fruit	Captain Cook	Hawaii	1
92	TKM_4194	TKM	D. takahashii	Morinda	Fruit	Captain Cook	Hawaii	1
92	TKM_2554	TKM	D. takahashii	Morinda	Fruit	Captain Cook	Hawaii	1
92	ANM_3249	ANM	D. ananassae	Morinda	Fruit	Captain Cook	Hawaii	1
92	TKM_1684	TKM	D. takahashii	Morinda	Fruit	Captain Cook	Hawaii	1
92	TKM_4558	TKM	D. takahashii	Morinda	Fruit	Captain Cook	Hawaii	1
92	TKM_2302	TKM	D. takahashii	Morinda	Fruit	Captain Cook	Hawaii	1
92	TKM_2639	TKM	D. takahashii	Morinda	Fruit	Captain Cook	Hawaii	1
92	TKM_946	TKM	D. takahashii	Morinda	Fruit	Captain Cook	Hawaii	1
92	TKM_3826	TKM	D. takahashii	Morinda	Fruit	Captain Cook	Hawaii	1
92	ANM_3185	ANM	D. ananassae	Morinda	Fruit	Captain Cook	Hawaii	1
92	TKM_4778	TKM	D. takahashii	Morinda	Fruit	Captain Cook	Hawaii	1
92	TKM_2799	TKM	D. takahashii	Morinda	Fruit	Captain Cook	Hawaii	1
92	TKM_1679	TKM	D. takahashii	Morinda	Fruit	Captain Cook	Hawaii	1
92	ANM_911	ANM	D. ananassae	Morinda	Fruit	Captain Cook	Hawaii	1
92	TKM_3355	TKM	D. takahashii	Morinda	Fruit	Captain Cook	Hawaii	1
92	TKM_659	TKM	D. takahashii	Morinda	Fruit	Captain Cook	Hawaii	1
92	TKM_4721	TKM	D. takahashii	Morinda	Fruit	Captain Cook	Hawaii	1
92	ANM_4398	ANM	D. ananassae	Morinda	Fruit	Captain Cook	Hawaii	1
92	TKM_3574	TKM	D. takahashii	Morinda	Fruit	Captain Cook	Hawaii	1
92	TKM_2335	TKM	D. takahashii	Morinda	Fruit	Captain Cook	Hawaii	1
92	TKM_2528	TKM	D. takahashii	Morinda	Fruit	Captain Cook	Hawaii	1
92	TKM_2349	TKM	D. takahashii	Morinda	Fruit	Captain Cook	Hawaii	1
92	TKM_2104	TKM	D. takahashii	Morinda	Fruit	Captain Cook	Hawaii	1
92	TKM_1088	TKM	D. takahashii	Morinda	Fruit	Captain Cook	Hawaii	1
92	TKM_4861	TKM	D. takahashii	Morinda	Fruit	Captain Cook	Hawaii	1
92	ANM_4055	ANM	D. ananassae	Morinda	Fruit	Captain Cook	Hawaii	1
92	ANM_2946	ANM	D. ananassae	Morinda	Fruit	Captain Cook	Hawaii	1
92	TKM_856	TKM	D. takahashii	Morinda	Fruit	Captain Cook	Hawaii	1
92	ANM_3123	ANM	D. ananassae	Morinda	Fruit	Captain Cook	Hawaii	1
92	TKM_2784	TKM	D. takahashii	Morinda	Fruit	Captain Cook	Hawaii	1
92	TKM_2064	TKM	D. takahashii	Morinda	Fruit	Captain Cook	Hawaii	1
92	TKM_187	TKM	D. takahashii	Morinda	Fruit	Captain Cook	Hawaii	1
92	TKM_4087	TKM	D. takahashii	Morinda	Fruit	Captain Cook	Hawaii	1
92	TKM_3952	TKM	D. takahashii	Morinda	Fruit	Captain Cook	Hawaii	1
92	TKM_4876	TKM	D. takahashii	Morinda	Fruit	Captain Cook	Hawaii	1
92	TKM_3794	TKM	D. takahashii	Morinda	Fruit	Captain Cook	Hawaii	1
92	TKM_3257	TKM	D. takahashii	Morinda	Fruit	Captain Cook	Hawaii	1
92	TKM_2455	TKM	D. takahashii	Morinda	Fruit	Captain Cook	Hawaii	1
92	TKM_4271	TKM	D. takahashii	Morinda	Fruit	Captain Cook	Hawaii	1
92	TKM_2253	TKM	D. takahashii	Morinda	Fruit	Captain Cook	Hawaii	1
92	ANM_4612	ANM	D. ananassae	Morinda	Fruit	Captain Cook	Hawaii	1
92	TKM_3373	TKM	D. takahashii	Morinda	Fruit	Captain Cook	Hawaii	1
92	TKM_3885	TKM	D. takahashii	Morinda	Fruit	Captain Cook	Hawaii	1
92	TKM_1190	TKM	D. takahashii	Morinda	Fruit	Captain Cook	Hawaii	1
92	TKM_3950	TKM	D. takahashii	Morinda	Fruit	Captain Cook	Hawaii	1
92	TKM_1427	TKM	D. takahashii	Morinda	Fruit	Captain Cook	Hawaii	1
92	TKM_3550	TKM	D. takahashii	Morinda	Fruit	Captain Cook	Hawaii	1
92	TKM_137	TKM	D. takahashii	Morinda	Fruit	Captain Cook	Hawaii	1
92	TKM_3878	TKM	D. takahashii	Morinda	Fruit	Captain Cook	Hawaii	1
92	TKM_3300	TKM	D. takahashii	Morinda	Fruit	Captain Cook	Hawaii	1
92	TKM_3994	TKM	D. takahashii	Morinda	Fruit	Captain Cook	Hawaii	1
92	TKM_2262	TKM	D. takahashii	Morinda	Fruit	Captain Cook	Hawaii	1
92	TKM_3954	TKM	D. takahashii	Morinda	Fruit	Captain Cook	Hawaii	1
92	TKM_2060	TKM	D. takahashii	Morinda	Fruit	Captain Cook	Hawaii	1
92	TKM_4860	TKM	D. takahashii	Morinda	Fruit	Captain Cook	Hawaii	1
92	TKM_824	TKM	D. takahashii	Morinda	Fruit	Captain Cook	Hawaii	1
92	TKM_4809	TKM	D. takahashii	Morinda	Fruit	Captain Cook	Hawaii	1
92	TKM_4476	TKM	D. takahashii	Morinda	Fruit	Captain Cook	Hawaii	1
92	TKM_1355	TKM	D. takahashii	Morinda	Fruit	Captain Cook	Hawaii	1
92	TKM_777	TKM	D. takahashii	Morinda	Fruit	Captain Cook	Hawaii	1
92	TKM_4752	TKM	D. takahashii	Morinda	Fruit	Captain Cook	Hawaii	1
92	TKM_2248	TKM	D. takahashii	Morinda	Fruit	Captain Cook	Hawaii	1
92	TKM_1198	TKM	D. takahashii	Morinda	Fruit	Captain Cook	Hawaii	1
92	TKM_10	TKM	D. takahashii	Morinda	Fruit	Captain Cook	Hawaii	1
58	IMH_2615	IMH	D. sp. Affinis immigrans	Hibiscus	Flowers	Captain Cook	Hawaii	1
58	IMH_2437	IMH	D. sp. Affinis immigrans	Hibiscus	Flowers	Captain Cook	Hawaii	1
58	IMH_4103	IMH	D. sp. Affinis immigrans	Hibiscus	Flowers	Captain Cook	Hawaii	1
58	IMH_2408	IMH	D. sp. Affinis immigrans	Hibiscus	Flowers	Captain Cook	Hawaii	1
58	IMH_2885	IMH	D. sp. Affinis immigrans	Hibiscus	Flowers	Captain Cook	Hawaii	1
58	IMH_2881	IMH	D. sp. Affinis immigrans	Hibiscus	Flowers	Captain Cook	Hawaii	1
58	IMH_3796	IMH	D. sp. Affinis immigrans	Hibiscus	Flowers	Captain Cook	Hawaii	1
58	IMH_1284	IMH	D. sp. Affinis immigrans	Hibiscus	Flowers	Captain Cook	Hawaii	1
58	IMH_1890	IMH	D. sp. Affinis immigrans	Hibiscus	Flowers	Captain Cook	Hawaii	1
58	IMH_1033	IMH	D. sp. Affinis immigrans	Hibiscus	Flowers	Captain Cook	Hawaii	1
58	IMH_4218	IMH	D. sp. Affinis immigrans	Hibiscus	Flowers	Captain Cook	Hawaii	1
58	MEC_779	MEC	D. malerkotliana	Terminalia	Fruit	Seychelles	Africa	1
58	IMH_4352	IMH	D. sp. Affinis immigrans	Hibiscus	Flowers	Captain Cook	Hawaii	1
58	IMH_3120	IMH	D. sp. Affinis immigrans	Hibiscus	Flowers	Captain Cook	Hawaii	1
58	IMH_3986	IMH	D. sp. Affinis immigrans	Hibiscus	Flowers	Captain Cook	Hawaii	1
58	IMH_2839	IMH	D. sp. Affinis immigrans	Hibiscus	Flowers	Captain Cook	Hawaii	1
58	IMH_2937	IMH	D. sp. Affinis immigrans	Hibiscus	Flowers	Captain Cook	Hawaii	1
58	IMH_2003	IMH	D. sp. Affinis immigrans	Hibiscus	Flowers	Captain Cook	Hawaii	1
58	IMH_3982	IMH	D. sp. Affinis immigrans	Hibiscus	Flowers	Captain Cook	Hawaii	1
58	IMH_847	IMH	D. sp. Affinis immigrans	Hibiscus	Flowers	Captain Cook	Hawaii	1
58	IMH_4436	IMH	D. sp. Affinis immigrans	Hibiscus	Flowers	Captain Cook	Hawaii	1
58	IMH_3054	IMH	D. sp. Affinis immigrans	Hibiscus	Flowers	Captain Cook	Hawaii	1
58	IMH_4880	IMH	D. sp. Affinis immigrans	Hibiscus	Flowers	Captain Cook	Hawaii	1
58	IMH_2298	IMH	D. sp. Affinis immigrans	Hibiscus	Flowers	Captain Cook	Hawaii	1
58	IMH_4795	IMH	D. sp. Affinis immigrans	Hibiscus	Flowers	Captain Cook	Hawaii	1
58	IMH_3196	IMH	D. sp. Affinis immigrans	Hibiscus	Flowers	Captain Cook	Hawaii	1
58	IMH_2719	IMH	D. sp. Affinis immigrans	Hibiscus	Flowers	Captain Cook	Hawaii	1
58	IMH_772	IMH	D. sp. Affinis immigrans	Hibiscus	Flowers	Captain Cook	Hawaii	1
58	IMH_3425	IMH	D. sp. Affinis immigrans	Hibiscus	Flowers	Captain Cook	Hawaii	1
58	IMH_3116	IMH	D. sp. Affinis immigrans	Hibiscus	Flowers	Captain Cook	Hawaii	1
58	IMH_3438	IMH	D. sp. Affinis immigrans	Hibiscus	Flowers	Captain Cook	Hawaii	1
58	IMH_2296	IMH	D. sp. Affinis immigrans	Hibiscus	Flowers	Captain Cook	Hawaii	1
58	IMH_4431	IMH	D. sp. Affinis immigrans	Hibiscus	Flowers	Captain Cook	Hawaii	1
58	IMH_3656	IMH	D. sp. Affinis immigrans	Hibiscus	Flowers	Captain Cook	Hawaii	1
58	PON_2097	PON	Unk Two	Pandanus	Fruit	Waimanu	Hawaii	1
58	IMH_1648	IMH	D. sp. Affinis immigrans	Hibiscus	Flowers	Captain Cook	Hawaii	1
58	IMH_1926	IMH	D. sp. Affinis immigrans	Hibiscus	Flowers	Captain Cook	Hawaii	1
58	IMH_1797	IMH	D. sp. Affinis immigrans	Hibiscus	Flowers	Captain Cook	Hawaii	1
58	IMH_4857	IMH	D. sp. Affinis immigrans	Hibiscus	Flowers	Captain Cook	Hawaii	1
58	IMH_1405	IMH	D. sp. Affinis immigrans	Hibiscus	Flowers	Captain Cook	Hawaii	1
58	IMH_4204	IMH	D. sp. Affinis immigrans	Hibiscus	Flowers	Captain Cook	Hawaii	1
58	IMH_1333	IMH	D. sp. Affinis immigrans	Hibiscus	Flowers	Captain Cook	Hawaii	1
58	IMH_2275	IMH	D. sp. Affinis immigrans	Hibiscus	Flowers	Captain Cook	Hawaii	1
58	IMH_285	IMH	D. sp. Affinis immigrans	Hibiscus	Flowers	Captain Cook	Hawaii	1
58	IMH_3485	IMH	D. sp. Affinis immigrans	Hibiscus	Flowers	Captain Cook	Hawaii	1
58	IMH_3157	IMH	D. sp. Affinis immigrans	Hibiscus	Flowers	Captain Cook	Hawaii	1
58	IMH_4552	IMH	D. sp. Affinis immigrans	Hibiscus	Flowers	Captain Cook	Hawaii	1
58	IMH_4166	IMH	D. sp. Affinis immigrans	Hibiscus	Flowers	Captain Cook	Hawaii	1
58	IMH_2494	IMH	D. sp. Affinis immigrans	Hibiscus	Flowers	Captain Cook	Hawaii	1
58	IMH_1024	IMH	D. sp. Affinis immigrans	Hibiscus	Flowers	Captain Cook	Hawaii	1
58	IMH_4371	IMH	D. sp. Affinis immigrans	Hibiscus	Flowers	Captain Cook	Hawaii	1
58	IMH_2943	IMH	D. sp. Affinis immigrans	Hibiscus	Flowers	Captain Cook	Hawaii	1
58	IMH_2843	IMH	D. sp. Affinis immigrans	Hibiscus	Flowers	Captain Cook	Hawaii	1
58	IMH_2673	IMH	D. sp. Affinis immigrans	Hibiscus	Flowers	Captain Cook	Hawaii	1
58	IMH_3166	IMH	D. sp. Affinis immigrans	Hibiscus	Flowers	Captain Cook	Hawaii	1
58	IMH_894	IMH	D. sp. Affinis immigrans	Hibiscus	Flowers	Captain Cook	Hawaii	1
58	IMH_3540	IMH	D. sp. Affinis immigrans	Hibiscus	Flowers	Captain Cook	Hawaii	1
58	IMH_266	IMH	D. sp. Affinis immigrans	Hibiscus	Flowers	Captain Cook	Hawaii	1
55	TKM_4573	TKM	D. takahashii	Morinda	Fruit	Captain Cook	Hawaii	1
55	TKM_3736	TKM	D. takahashii	Morinda	Fruit	Captain Cook	Hawaii	1
55	TKM_2664	TKM	D. takahashii	Morinda	Fruit	Captain Cook	Hawaii	1
55	TKM_1850	TKM	D. takahashii	Morinda	Fruit	Captain Cook	Hawaii	1
55	TKM_2100	TKM	D. takahashii	Morinda	Fruit	Captain Cook	Hawaii	1
55	ANM_1419	ANM	D. ananassae	Morinda	Fruit	Captain Cook	Hawaii	1
55	TKM_1371	TKM	D. takahashii	Morinda	Fruit	Captain Cook	Hawaii	1
55	TKM_1295	TKM	D. takahashii	Morinda	Fruit	Captain Cook	Hawaii	1
55	TKM_3263	TKM	D. takahashii	Morinda	Fruit	Captain Cook	Hawaii	1
55	TKM_2645	TKM	D. takahashii	Morinda	Fruit	Captain Cook	Hawaii	1
55	ANM_4636	ANM	D. ananassae	Morinda	Fruit	Captain Cook	Hawaii	1
55	TKM_2018	TKM	D. takahashii	Morinda	Fruit	Captain Cook	Hawaii	1
55	TKM_4256	TKM	D. takahashii	Morinda	Fruit	Captain Cook	Hawaii	1
55	ANM_2824	ANM	D. ananassae	Morinda	Fruit	Captain Cook	Hawaii	1
55	TKM_3052	TKM	D. takahashii	Morinda	Fruit	Captain Cook	Hawaii	1
55	TKM_1179	TKM	D. takahashii	Morinda	Fruit	Captain Cook	Hawaii	1
55	TKM_4509	TKM	D. takahashii	Morinda	Fruit	Captain Cook	Hawaii	1
55	TKM_3077	TKM	D. takahashii	Morinda	Fruit	Captain Cook	Hawaii	1
55	TKM_3380	TKM	D. takahashii	Morinda	Fruit	Captain Cook	Hawaii	1
55	ANM_1025	ANM	D. ananassae	Morinda	Fruit	Captain Cook	Hawaii	1
55	ANM_3579	ANM	D. ananassae	Morinda	Fruit	Captain Cook	Hawaii	1
55	TKM_1108	TKM	D. takahashii	Morinda	Fruit	Captain Cook	Hawaii	1
55	TKM_3365	TKM	D. takahashii	Morinda	Fruit	Captain Cook	Hawaii	1
55	TKM_844	TKM	D. takahashii	Morinda	Fruit	Captain Cook	Hawaii	1
55	TKM_2948	TKM	D. takahashii	Morinda	Fruit	Captain Cook	Hawaii	1
55	TKM_2846	TKM	D. takahashii	Morinda	Fruit	Captain Cook	Hawaii	1
55	TKM_4425	TKM	D. takahashii	Morinda	Fruit	Captain Cook	Hawaii	1
55	TKM_2208	TKM	D. takahashii	Morinda	Fruit	Captain Cook	Hawaii	1
55	TKM_4685	TKM	D. takahashii	Morinda	Fruit	Captain Cook	Hawaii	1
55	ANM_2756	ANM	D. ananassae	Morinda	Fruit	Captain Cook	Hawaii	1
55	TKM_1969	TKM	D. takahashii	Morinda	Fruit	Captain Cook	Hawaii	1
55	TKM_778	TKM	D. takahashii	Morinda	Fruit	Captain Cook	Hawaii	1
55	TKM_4781	TKM	D. takahashii	Morinda	Fruit	Captain Cook	Hawaii	1
55	TKM_2990	TKM	D. takahashii	Morinda	Fruit	Captain Cook	Hawaii	1
55	TKM_4388	TKM	D. takahashii	Morinda	Fruit	Captain Cook	Hawaii	1
55	TKM_2137	TKM	D. takahashii	Morinda	Fruit	Captain Cook	Hawaii	1
55	TKM_2928	TKM	D. takahashii	Morinda	Fruit	Captain Cook	Hawaii	1
55	TKM_2648	TKM	D. takahashii	Morinda	Fruit	Captain Cook	Hawaii	1
55	ANM_3915	ANM	D. ananassae	Morinda	Fruit	Captain Cook	Hawaii	1
55	TKM_575	TKM	D. takahashii	Morinda	Fruit	Captain Cook	Hawaii	1
55	TKM_4638	TKM	D. takahashii	Morinda	Fruit	Captain Cook	Hawaii	1
55	TKM_1618	TKM	D. takahashii	Morinda	Fruit	Captain Cook	Hawaii	1
55	TKM_1019	TKM	D. takahashii	Morinda	Fruit	Captain Cook	Hawaii	1
55	TKM_4379	TKM	D. takahashii	Morinda	Fruit	Captain Cook	Hawaii	1
55	TKM_2451	TKM	D. takahashii	Morinda	Fruit	Captain Cook	Hawaii	1
55	TKM_1390	TKM	D. takahashii	Morinda	Fruit	Captain Cook	Hawaii	1
55	TKM_803	TKM	D. takahashii	Morinda	Fruit	Captain Cook	Hawaii	1
55	TKM_3624	TKM	D. takahashii	Morinda	Fruit	Captain Cook	Hawaii	1
55	TKM_1060	TKM	D. takahashii	Morinda	Fruit	Captain Cook	Hawaii	1
55	TKM_3227	TKM	D. takahashii	Morinda	Fruit	Captain Cook	Hawaii	1
55	TKM_346	TKM	D. takahashii	Morinda	Fruit	Captain Cook	Hawaii	1
55	TKM_1882	TKM	D. takahashii	Morinda	Fruit	Captain Cook	Hawaii	1
55	TKM_627	TKM	D. takahashii	Morinda	Fruit	Captain Cook	Hawaii	1
55	ANM_4242	ANM	D. ananassae	Morinda	Fruit	Captain Cook	Hawaii	1
55	TKM_311	TKM	D. takahashii	Morinda	Fruit	Captain Cook	Hawaii	1
45	POM_4879	POM	Unk One	Ipomoea	Flowers	Waimanu	Hawaii	1
45	POM_2418	POM	Unk One	Ipomoea	Flowers	Waimanu	Hawaii	1
45	POM_3219	POM	Unk One	Ipomoea	Flowers	Waimanu	Hawaii	1
45	POM_2032	POM	Unk One	Ipomoea	Flowers	Waimanu	Hawaii	1
45	POM_3552	POM	Unk One	Ipomoea	Flowers	Waimanu	Hawaii	1
45	POM_1871	POM	Unk One	Ipomoea	Flowers	Waimanu	Hawaii	1
45	POM_3908	POM	Unk One	Ipomoea	Flowers	Waimanu	Hawaii	1
45	POM_1453	POM	Unk One	Ipomoea	Flowers	Waimanu	Hawaii	1
45	POM_4819	POM	Unk One	Ipomoea	Flowers	Waimanu	Hawaii	1
45	POM_4664	POM	Unk One	Ipomoea	Flowers	Waimanu	Hawaii	1
45	POM_2181	POM	Unk One	Ipomoea	Flowers	Waimanu	Hawaii	1
45	POM_1948	POM	Unk One	Ipomoea	Flowers	Waimanu	Hawaii	1
45	POM_4602	POM	Unk One	Ipomoea	Flowers	Waimanu	Hawaii	1
45	POM_3175	POM	Unk One	Ipomoea	Flowers	Waimanu	Hawaii	1
45	POM_1092	POM	Unk One	Ipomoea	Flowers	Waimanu	Hawaii	1
45	POM_4453	POM	Unk One	Ipomoea	Flowers	Waimanu	Hawaii	1
45	POM_1273	POM	Unk One	Ipomoea	Flowers	Waimanu	Hawaii	1
45	POM_4022	POM	Unk One	Ipomoea	Flowers	Waimanu	Hawaii	1
45	POM_3805	POM	Unk One	Ipomoea	Flowers	Waimanu	Hawaii	1
45	POM_4688	POM	Unk One	Ipomoea	Flowers	Waimanu	Hawaii	1
45	POM_769	POM	Unk One	Ipomoea	Flowers	Waimanu	Hawaii	1
45	POM_4464	POM	Unk One	Ipomoea	Flowers	Waimanu	Hawaii	1
45	POM_3993	POM	Unk One	Ipomoea	Flowers	Waimanu	Hawaii	1
45	POM_4048	POM	Unk One	Ipomoea	Flowers	Waimanu	Hawaii	1
45	POM_2627	POM	Unk One	Ipomoea	Flowers	Waimanu	Hawaii	1
45	POM_3965	POM	Unk One	Ipomoea	Flowers	Waimanu	Hawaii	1
45	POM_2726	POM	Unk One	Ipomoea	Flowers	Waimanu	Hawaii	1
45	POM_3363	POM	Unk One	Ipomoea	Flowers	Waimanu	Hawaii	1
45	POM_386	POM	Unk One	Ipomoea	Flowers	Waimanu	Hawaii	1
45	POM_4701	POM	Unk One	Ipomoea	Flowers	Waimanu	Hawaii	1
45	POM_4483	POM	Unk One	Ipomoea	Flowers	Waimanu	Hawaii	1
45	POM_4208	POM	Unk One	Ipomoea	Flowers	Waimanu	Hawaii	1
45	POM_1430	POM	Unk One	Ipomoea	Flowers	Waimanu	Hawaii	1
45	POM_4488	POM	Unk One	Ipomoea	Flowers	Waimanu	Hawaii	1
45	POM_4369	POM	Unk One	Ipomoea	Flowers	Waimanu	Hawaii	1
45	POM_1106	POM	Unk One	Ipomoea	Flowers	Waimanu	Hawaii	1
45	POM_136	POM	Unk One	Ipomoea	Flowers	Waimanu	Hawaii	1
45	POM_4123	POM	Unk One	Ipomoea	Flowers	Waimanu	Hawaii	1
45	POM_3957	POM	Unk One	Ipomoea	Flowers	Waimanu	Hawaii	1
45	POM_3025	POM	Unk One	Ipomoea	Flowers	Waimanu	Hawaii	1
45	POM_1515	POM	Unk One	Ipomoea	Flowers	Waimanu	Hawaii	1
45	POM_2674	POM	Unk One	Ipomoea	Flowers	Waimanu	Hawaii	1
45	POM_452	POM	Unk One	Ipomoea	Flowers	Waimanu	Hawaii	1
45	POM_2680	POM	Unk One	Ipomoea	Flowers	Waimanu	Hawaii	1
45	POM_39	POM	Unk One	Ipomoea	Flowers	Waimanu	Hawaii	1
44	POM_4698	POM	Unk One	Ipomoea	Flowers	Waimanu	Hawaii	1
44	POM_3127	POM	Unk One	Ipomoea	Flowers	Waimanu	Hawaii	1
44	POM_4303	POM	Unk One	Ipomoea	Flowers	Waimanu	Hawaii	1
44	POM_2934	POM	Unk One	Ipomoea	Flowers	Waimanu	Hawaii	1
44	POM_4002	POM	Unk One	Ipomoea	Flowers	Waimanu	Hawaii	1
44	POM_3308	POM	Unk One	Ipomoea	Flowers	Waimanu	Hawaii	1
44	POM_2343	POM	Unk One	Ipomoea	Flowers	Waimanu	Hawaii	1
44	POM_1957	POM	Unk One	Ipomoea	Flowers	Waimanu	Hawaii	1
44	POM_3914	POM	Unk One	Ipomoea	Flowers	Waimanu	Hawaii	1
44	POM_2874	POM	Unk One	Ipomoea	Flowers	Waimanu	Hawaii	1
44	POM_1741	POM	Unk One	Ipomoea	Flowers	Waimanu	Hawaii	1
44	POM_1448	POM	Unk One	Ipomoea	Flowers	Waimanu	Hawaii	1
44	POM_2656	POM	Unk One	Ipomoea	Flowers	Waimanu	Hawaii	1
44	POM_2240	POM	Unk One	Ipomoea	Flowers	Waimanu	Hawaii	1
44	POM_3139	POM	Unk One	Ipomoea	Flowers	Waimanu	Hawaii	1
44	POM_383	POM	Unk One	Ipomoea	Flowers	Waimanu	Hawaii	1
44	POM_4489	POM	Unk One	Ipomoea	Flowers	Waimanu	Hawaii	1
44	POM_4044	POM	Unk One	Ipomoea	Flowers	Waimanu	Hawaii	1
44	POM_1818	POM	Unk One	Ipomoea	Flowers	Waimanu	Hawaii	1
44	POM_1715	POM	Unk One	Ipomoea	Flowers	Waimanu	Hawaii	1
44	POM_4016	POM	Unk One	Ipomoea	Flowers	Waimanu	Hawaii	1
44	POM_3429	POM	Unk One	Ipomoea	Flowers	Waimanu	Hawaii	1
44	POM_2402	POM	Unk One	Ipomoea	Flowers	Waimanu	Hawaii	1
44	POM_1539	POM	Unk One	Ipomoea	Flowers	Waimanu	Hawaii	1
44	POM_3069	POM	Unk One	Ipomoea	Flowers	Waimanu	Hawaii	1
44	POM_2787	POM	Unk One	Ipomoea	Flowers	Waimanu	Hawaii	1
44	POM_2261	POM	Unk One	Ipomoea	Flowers	Waimanu	Hawaii	1
44	POM_1968	POM	Unk One	Ipomoea	Flowers	Waimanu	Hawaii	1
44	POM_4133	POM	Unk One	Ipomoea	Flowers	Waimanu	Hawaii	1
44	POM_682	POM	Unk One	Ipomoea	Flowers	Waimanu	Hawaii	1
44	POM_3999	POM	Unk One	Ipomoea	Flowers	Waimanu	Hawaii	1
44	POM_665	POM	Unk One	Ipomoea	Flowers	Waimanu	Hawaii	1
44	POM_3315	POM	Unk One	Ipomoea	Flowers	Waimanu	Hawaii	1
44	POM_2463	POM	Unk One	Ipomoea	Flowers	Waimanu	Hawaii	1
44	POM_3243	POM	Unk One	Ipomoea	Flowers	Waimanu	Hawaii	1
44	POM_810	POM	Unk One	Ipomoea	Flowers	Waimanu	Hawaii	1
44	POM_4200	POM	Unk One	Ipomoea	Flowers	Waimanu	Hawaii	1
44	POM_2237	POM	Unk One	Ipomoea	Flowers	Waimanu	Hawaii	1
44	POM_1104	POM	Unk One	Ipomoea	Flowers	Waimanu	Hawaii	1
44	POM_515	POM	Unk One	Ipomoea	Flowers	Waimanu	Hawaii	1
44	POM_4171	POM	Unk One	Ipomoea	Flowers	Waimanu	Hawaii	1
44	POM_3320	POM	Unk One	Ipomoea	Flowers	Waimanu	Hawaii	1
44	POM_1616	POM	Unk One	Ipomoea	Flowers	Waimanu	Hawaii	1
44	POM_349	POM	Unk One	Ipomoea	Flowers	Waimanu	Hawaii	1
41	MEC_2794	MEC	D. malerkotliana	Terminalia	Fruit	Seychelles	Africa	1
41	ELA_3313	ELA	D. elegans	Alpinia	Flowers	Taiwan	Taiwan	1
41	ELA_1675	ELA	D. elegans	Alpinia	Flowers	Taiwan	Taiwan	1
41	ELA_4530	ELA	D. elegans	Alpinia	Flowers	Taiwan	Taiwan	1
41	ELA_4492	ELA	D. elegans	Alpinia	Flowers	Taiwan	Taiwan	1
41	ELA_3568	ELA	D. elegans	Alpinia	Flowers	Taiwan	Taiwan	1
41	ELA_1376	ELA	D. elegans	Alpinia	Flowers	Taiwan	Taiwan	1
41	ELA_4802	ELA	D. elegans	Alpinia	Flowers	Taiwan	Taiwan	1
41	MEC_3646	MEC	D. malerkotliana	Terminalia	Fruit	Seychelles	Africa	1
41	ELA_2404	ELA	D. elegans	Alpinia	Flowers	Taiwan	Taiwan	1
41	ELA_1549	ELA	D. elegans	Alpinia	Flowers	Taiwan	Taiwan	1
41	TKM_2160	TKM	D. takahashii	Morinda	Fruit	Captain Cook	Hawaii	1
41	ELA_1374	ELA	D. elegans	Alpinia	Flowers	Taiwan	Taiwan	1
41	MEC_3375	MEC	D. malerkotliana	Terminalia	Fruit	Seychelles	Africa	1
41	MEC_724	MEC	D. malerkotliana	Terminalia	Fruit	Seychelles	Africa	1
41	MEC_4335	MEC	D. malerkotliana	Terminalia	Fruit	Seychelles	Africa	1
41	MEC_3600	MEC	D. malerkotliana	Terminalia	Fruit	Seychelles	Africa	1
41	MEC_1015	MEC	D. malerkotliana	Terminalia	Fruit	Seychelles	Africa	1
41	ELA_791	ELA	D. elegans	Alpinia	Flowers	Taiwan	Taiwan	1
41	MEC_3995	MEC	D. malerkotliana	Terminalia	Fruit	Seychelles	Africa	1
41	ELA_2481	ELA	D. elegans	Alpinia	Flowers	Taiwan	Taiwan	1
41	ELA_1557	ELA	D. elegans	Alpinia	Flowers	Taiwan	Taiwan	1
41	MEC_302	MEC	D. malerkotliana	Terminalia	Fruit	Seychelles	Africa	1
41	ELD_4674	ELD	D. elegans	Brugmansia	Flowers	Taiwan	Taiwan	1
41	ELA_2992	ELA	D. elegans	Alpinia	Flowers	Taiwan	Taiwan	1
41	MEC_2391	MEC	D. malerkotliana	Terminalia	Fruit	Seychelles	Africa	1
41	ELA_2017	ELA	D. elegans	Alpinia	Flowers	Taiwan	Taiwan	1
41	ELA_4356	ELA	D. elegans	Alpinia	Flowers	Taiwan	Taiwan	1
41	ELA_2687	ELA	D. elegans	Alpinia	Flowers	Taiwan	Taiwan	1
41	ELA_2714	ELA	D. elegans	Alpinia	Flowers	Taiwan	Taiwan	1
41	ELA_284	ELA	D. elegans	Alpinia	Flowers	Taiwan	Taiwan	1
41	MEC_3961	MEC	D. malerkotliana	Terminalia	Fruit	Seychelles	Africa	1
41	MEC_567	MEC	D. malerkotliana	Terminalia	Fruit	Seychelles	Africa	1
41	ELA_1508	ELA	D. elegans	Alpinia	Flowers	Taiwan	Taiwan	1
41	ELA_1387	ELA	D. elegans	Alpinia	Flowers	Taiwan	Taiwan	1
41	ELA_4745	ELA	D. elegans	Alpinia	Flowers	Taiwan	Taiwan	1
41	ELA_1282	ELA	D. elegans	Alpinia	Flowers	Taiwan	Taiwan	1
41	MEC_988	MEC	D. malerkotliana	Terminalia	Fruit	Seychelles	Africa	1
41	ELA_742	ELA	D. elegans	Alpinia	Flowers	Taiwan	Taiwan	1
41	MEC_2526	MEC	D. malerkotliana	Terminalia	Fruit	Seychelles	Africa	1
41	MEC_199	MEC	D. malerkotliana	Terminalia	Fruit	Seychelles	Africa	1
31	TKM_4109	TKM	D. takahashii	Morinda	Fruit	Captain Cook	Hawaii	1
31	TKM_1517	TKM	D. takahashii	Morinda	Fruit	Captain Cook	Hawaii	1
31	TKM_2661	TKM	D. takahashii	Morinda	Fruit	Captain Cook	Hawaii	1
31	TKM_554	TKM	D. takahashii	Morinda	Fruit	Captain Cook	Hawaii	1
31	TKM_4716	TKM	D. takahashii	Morinda	Fruit	Captain Cook	Hawaii	1
31	TKM_3990	TKM	D. takahashii	Morinda	Fruit	Captain Cook	Hawaii	1
31	TKM_1584	TKM	D. takahashii	Morinda	Fruit	Captain Cook	Hawaii	1
31	TKM_545	TKM	D. takahashii	Morinda	Fruit	Captain Cook	Hawaii	1
31	TKM_4456	TKM	D. takahashii	Morinda	Fruit	Captain Cook	Hawaii	1
31	TKM_4188	TKM	D. takahashii	Morinda	Fruit	Captain Cook	Hawaii	1
31	TKM_2171	TKM	D. takahashii	Morinda	Fruit	Captain Cook	Hawaii	1
31	TKM_571	TKM	D. takahashii	Morinda	Fruit	Captain Cook	Hawaii	1
31	TKM_4769	TKM	D. takahashii	Morinda	Fruit	Captain Cook	Hawaii	1
31	TKM_2679	TKM	D. takahashii	Morinda	Fruit	Captain Cook	Hawaii	1
31	ANM_3875	ANM	D. ananassae	Morinda	Fruit	Captain Cook	Hawaii	1
31	TKM_203	TKM	D. takahashii	Morinda	Fruit	Captain Cook	Hawaii	1
31	TKM_3563	TKM	D. takahashii	Morinda	Fruit	Captain Cook	Hawaii	1
31	TKM_4853	TKM	D. takahashii	Morinda	Fruit	Captain Cook	Hawaii	1
31	ANM_2083	ANM	D. ananassae	Morinda	Fruit	Captain Cook	Hawaii	1
31	TKM_3654	TKM	D. takahashii	Morinda	Fruit	Captain Cook	Hawaii	1
31	TKM_1038	TKM	D. takahashii	Morinda	Fruit	Captain Cook	Hawaii	1
31	ANM_955	ANM	D. ananassae	Morinda	Fruit	Captain Cook	Hawaii	1
31	TKM_942	TKM	D. takahashii	Morinda	Fruit	Captain Cook	Hawaii	1
31	TKM_4875	TKM	D. takahashii	Morinda	Fruit	Captain Cook	Hawaii	1
31	TKM_1670	TKM	D. takahashii	Morinda	Fruit	Captain Cook	Hawaii	1
31	TKM_3432	TKM	D. takahashii	Morinda	Fruit	Captain Cook	Hawaii	1
31	TKM_461	TKM	D. takahashii	Morinda	Fruit	Captain Cook	Hawaii	1
31	TKM_4139	TKM	D. takahashii	Morinda	Fruit	Captain Cook	Hawaii	1
31	TKM_1406	TKM	D. takahashii	Morinda	Fruit	Captain Cook	Hawaii	1
31	TKM_1413	TKM	D. takahashii	Morinda	Fruit	Captain Cook	Hawaii	1
31	TKM_168	TKM	D. takahashii	Morinda	Fruit	Captain Cook	Hawaii	1
15	POM_3394	POM	Unk One	Ipomoea	Flowers	Waimanu	Hawaii	1
15	POM_3627	POM	Unk One	Ipomoea	Flowers	Waimanu	Hawaii	1
15	POM_2303	POM	Unk One	Ipomoea	Flowers	Waimanu	Hawaii	1
15	POM_4205	POM	Unk One	Ipomoea	Flowers	Waimanu	Hawaii	1
15	POM_3515	POM	Unk One	Ipomoea	Flowers	Waimanu	Hawaii	1
15	POM_4499	POM	Unk One	Ipomoea	Flowers	Waimanu	Hawaii	1
15	POM_1417	POM	Unk One	Ipomoea	Flowers	Waimanu	Hawaii	1
15	POM_4538	POM	Unk One	Ipomoea	Flowers	Waimanu	Hawaii	1
15	POM_2198	POM	Unk One	Ipomoea	Flowers	Waimanu	Hawaii	1
15	POM_2840	POM	Unk One	Ipomoea	Flowers	Waimanu	Hawaii	1
15	POM_1789	POM	Unk One	Ipomoea	Flowers	Waimanu	Hawaii	1
15	POM_3420	POM	Unk One	Ipomoea	Flowers	Waimanu	Hawaii	1
15	POM_2947	POM	Unk One	Ipomoea	Flowers	Waimanu	Hawaii	1
15	POM_3722	POM	Unk One	Ipomoea	Flowers	Waimanu	Hawaii	1
15	POM_834	POM	Unk One	Ipomoea	Flowers	Waimanu	Hawaii	1
14	IMH_3909	IMH	D. sp. Affinis immigrans	Hibiscus	Flowers	Captain Cook	Hawaii	1
14	IMH_934	IMH	D. sp. Affinis immigrans	Hibiscus	Flowers	Captain Cook	Hawaii	1
14	IMH_3522	IMH	D. sp. Affinis immigrans	Hibiscus	Flowers	Captain Cook	Hawaii	1
14	IMH_1159	IMH	D. sp. Affinis immigrans	Hibiscus	Flowers	Captain Cook	Hawaii	1
14	IMH_4384	IMH	D. sp. Affinis immigrans	Hibiscus	Flowers	Captain Cook	Hawaii	1
14	IMH_243	IMH	D. sp. Affinis immigrans	Hibiscus	Flowers	Captain Cook	Hawaii	1
14	IMH_4185	IMH	D. sp. Affinis immigrans	Hibiscus	Flowers	Captain Cook	Hawaii	1
14	IMH_3899	IMH	D. sp. Affinis immigrans	Hibiscus	Flowers	Captain Cook	Hawaii	1
14	IMH_3126	IMH	D. sp. Affinis immigrans	Hibiscus	Flowers	Captain Cook	Hawaii	1
14	IMH_1178	IMH	D. sp. Affinis immigrans	Hibiscus	Flowers	Captain Cook	Hawaii	1
14	IMH_4550	IMH	D. sp. Affinis immigrans	Hibiscus	Flowers	Captain Cook	Hawaii	1
14	IMH_3888	IMH	D. sp. Affinis immigrans	Hibiscus	Flowers	Captain Cook	Hawaii	1
14	IMH_3712	IMH	D. sp. Affinis immigrans	Hibiscus	Flowers	Captain Cook	Hawaii	1
14	IMH_165	IMH	D. sp. Affinis immigrans	Hibiscus	Flowers	Captain Cook	Hawaii	1
9.1	ICF_4653	ICF	D. immigrans	Citrus	Fruit	Wolfskill	North America	1
9.1	ICF_3932	ICF	D. immigrans	Citrus	Fruit	Wolfskill	North America	1
9.1	ICF_4376	ICF	D. immigrans	Citrus	Fruit	Wolfskill	North America	1
9.1	ICF_2222	ICF	D. immigrans	Citrus	Fruit	Wolfskill	North America	1
9.1	ICF_3071	ICF	D. immigrans	Citrus	Fruit	Wolfskill	North America	1
9.1	ICF_1945	ICF	D. immigrans	Citrus	Fruit	Wolfskill	North America	1
9.1	ICF_2649	ICF	D. immigrans	Citrus	Fruit	Wolfskill	North America	1
9.1	ICF_2999	ICF	D. immigrans	Citrus	Fruit	Wolfskill	North America	1
9.1	ICF_114	ICF	D. immigrans	Citrus	Fruit	Wolfskill	North America	1
9.2	ELA_3280	ELA	D. elegans	Alpinia	Flowers	Taiwan	Taiwan	1
9.2	ELA_2690	ELA	D. elegans	Alpinia	Flowers	Taiwan	Taiwan	1
9.2	MEC_3092	MEC	D. malerkotliana	Terminalia	Fruit	Seychelles	Africa	1
9.2	MEC_2264	MEC	D. malerkotliana	Terminalia	Fruit	Seychelles	Africa	1
9.2	ELA_2133	ELA	D. elegans	Alpinia	Flowers	Taiwan	Taiwan	1
9.2	ELA_3757	ELA	D. elegans	Alpinia	Flowers	Taiwan	Taiwan	1
9.2	ELA_1593	ELA	D. elegans	Alpinia	Flowers	Taiwan	Taiwan	1
9.2	MEC_981	MEC	D. malerkotliana	Terminalia	Fruit	Seychelles	Africa	1
9.2	ELA_598	ELA	D. elegans	Alpinia	Flowers	Taiwan	Taiwan	1
9.3	POM_4699	POM	Unk One	Ipomoea	Flowers	Waimanu	Hawaii	1
9.3	POM_4285	POM	Unk One	Ipomoea	Flowers	Waimanu	Hawaii	1
9.3	POM_3230	POM	Unk One	Ipomoea	Flowers	Waimanu	Hawaii	1
9.3	POM_2439	POM	Unk One	Ipomoea	Flowers	Waimanu	Hawaii	1
9.3	POM_3058	POM	Unk One	Ipomoea	Flowers	Waimanu	Hawaii	1
9.3	POM_1324	POM	Unk One	Ipomoea	Flowers	Waimanu	Hawaii	1
9.3	POM_4822	POM	Unk One	Ipomoea	Flowers	Waimanu	Hawaii	1
9.3	POM_2637	POM	Unk One	Ipomoea	Flowers	Waimanu	Hawaii	1
9.3	POM_1307	POM	Unk One	Ipomoea	Flowers	Waimanu	Hawaii	1
8.1	ELA_2271	ELA	D. elegans	Alpinia	Flowers	Taiwan	Taiwan	1
8.1	FNS_1429	FNS	D. falleni	Russula	Mushrooms	New York	North America	1
8.1	ELA_3124	ELA	D. elegans	Alpinia	Flowers	Taiwan	Taiwan	1
8.1	MEC_194	MEC	D. malerkotliana	Terminalia	Fruit	Seychelles	Africa	1
8.1	ELA_2041	ELA	D. elegans	Alpinia	Flowers	Taiwan	Taiwan	1
8.1	MEC_1272	MEC	D. malerkotliana	Terminalia	Fruit	Seychelles	Africa	1
8.1	MEC_1066	MEC	D. malerkotliana	Terminalia	Fruit	Seychelles	Africa	1
8.1	ELA_26	ELA	D. elegans	Alpinia	Flowers	Taiwan	Taiwan	1
8.2	IMH_4609	IMH	D. sp. Affinis immigrans	Hibiscus	Flowers	Captain Cook	Hawaii	1
8.2	IMH_2653	IMH	D. sp. Affinis immigrans	Hibiscus	Flowers	Captain Cook	Hawaii	1
8.2	IMH_3702	IMH	D. sp. Affinis immigrans	Hibiscus	Flowers	Captain Cook	Hawaii	1
8.2	IMH_1249	IMH	D. sp. Affinis immigrans	Hibiscus	Flowers	Captain Cook	Hawaii	1
8.2	IMH_4719	IMH	D. sp. Affinis immigrans	Hibiscus	Flowers	Captain Cook	Hawaii	1
8.2	IMH_4452	IMH	D. sp. Affinis immigrans	Hibiscus	Flowers	Captain Cook	Hawaii	1
8.2	IMH_2347	IMH	D. sp. Affinis immigrans	Hibiscus	Flowers	Captain Cook	Hawaii	1
8.2	IMH_1007	IMH	D. sp. Affinis immigrans	Hibiscus	Flowers	Captain Cook	Hawaii	1
6.1	TKM_2812	TKM	D. takahashii	Morinda	Fruit	Captain Cook	Hawaii	1
6.1	TKM_952	TKM	D. takahashii	Morinda	Fruit	Captain Cook	Hawaii	1
6.1	TKM_3150	TKM	D. takahashii	Morinda	Fruit	Captain Cook	Hawaii	1
6.1	TKM_2212	TKM	D. takahashii	Morinda	Fruit	Captain Cook	Hawaii	1
6.1	TKM_1321	TKM	D. takahashii	Morinda	Fruit	Captain Cook	Hawaii	1
6.1	TKM_747	TKM	D. takahashii	Morinda	Fruit	Captain Cook	Hawaii	1
6.2	ICF_3508	ICF	D. immigrans	Citrus	Fruit	Wolfskill	North America	1
6.2	ICF_2602	ICF	D. immigrans	Citrus	Fruit	Wolfskill	North America	1
6.2	ICF_2941	ICF	D. immigrans	Citrus	Fruit	Wolfskill	North America	1
6.2	ICF_1663	ICF	D. immigrans	Citrus	Fruit	Wolfskill	North America	1
6.2	NNS_1790	NNS	D. neotestacea	Russula	Mushrooms	New York	North America	1
6.2	ICF_771	ICF	D. immigrans	Citrus	Fruit	Wolfskill	North America	1
5.1	MEC_2187	MEC	D. malerkotliana	Terminalia	Fruit	Seychelles	Africa	1
5.1	MEC_1277	MEC	D. malerkotliana	Terminalia	Fruit	Seychelles	Africa	1
5.1	MEC_618	MEC	D. malerkotliana	Terminalia	Fruit	Seychelles	Africa	1
5.1	MEC_478	MEC	D. malerkotliana	Terminalia	Fruit	Seychelles	Africa	1
5.1	MEC_272	MEC	D. malerkotliana	Terminalia	Fruit	Seychelles	Africa	1
5.2	POM_1851	POM	Unk One	Ipomoea	Flowers	Waimanu	Hawaii	1
5.2	POM_4808	POM	Unk One	Ipomoea	Flowers	Waimanu	Hawaii	1
5.2	POM_664	POM	Unk One	Ipomoea	Flowers	Waimanu	Hawaii	1
5.2	POM_4508	POM	Unk One	Ipomoea	Flowers	Waimanu	Hawaii	1
5.2	POM_465	POM	Unk One	Ipomoea	Flowers	Waimanu	Hawaii	1
5.3	TKM_3964	TKM	D. takahashii	Morinda	Fruit	Captain Cook	Hawaii	1
5.3	TKM_2585	TKM	D. takahashii	Morinda	Fruit	Captain Cook	Hawaii	1
5.3	TKM_2410	TKM	D. takahashii	Morinda	Fruit	Captain Cook	Hawaii	1
5.3	TKM_3960	TKM	D. takahashii	Morinda	Fruit	Captain Cook	Hawaii	1
5.3	TKM_1222	TKM	D. takahashii	Morinda	Fruit	Captain Cook	Hawaii	1
5.4	POM_4426	POM	Unk One	Ipomoea	Flowers	Waimanu	Hawaii	1
5.4	POM_3599	POM	Unk One	Ipomoea	Flowers	Waimanu	Hawaii	1
5.4	POM_4312	POM	Unk One	Ipomoea	Flowers	Waimanu	Hawaii	1
5.4	POM_4052	POM	Unk One	Ipomoea	Flowers	Waimanu	Hawaii	1
5.4	POM_2076	POM	Unk One	Ipomoea	Flowers	Waimanu	Hawaii	1
4.1	MIC_2008	MIC	Microdros	Shelf	Mushrooms	Malaysia	Malaysia	1
4.1	MIC_1533	MIC	Microdros	Shelf	Mushrooms	Malaysia	Malaysia	1
4.1	MIC_2683	MIC	Microdros	Shelf	Mushrooms	Malaysia	Malaysia	1
4.1	MIC_308	MIC	Microdros	Shelf	Mushrooms	Malaysia	Malaysia	1
4.2	FNS_3535	FNS	D. falleni	Russula	Mushrooms	New York	North America	1
4.2	FNS_3327	FNS	D. falleni	Russula	Mushrooms	New York	North America	1
4.2	FNS_3609	FNS	D. falleni	Russula	Mushrooms	New York	North America	1
4.2	FNS_677	FNS	D. falleni	Russula	Mushrooms	New York	North America	1
4.3	IMH_4360	IMH	D. sp. Affinis immigrans	Hibiscus	Flowers	Captain Cook	Hawaii	1
4.3	IMH_1795	IMH	D. sp. Affinis immigrans	Hibiscus	Flowers	Captain Cook	Hawaii	1
4.3	IMH_3222	IMH	D. sp. Affinis immigrans	Hibiscus	Flowers	Captain Cook	Hawaii	1
4.3	IMH_997	IMH	D. sp. Affinis immigrans	Hibiscus	Flowers	Captain Cook	Hawaii	1
3.1	ICF_417	ICF	D. immigrans	Citrus	Fruit	Wolfskill	North America	1
3.1	NNS_1766	NNS	D. neotestacea	Russula	Mushrooms	New York	North America	1
3.1	ICF_131	ICF	D. immigrans	Citrus	Fruit	Wolfskill	North America	1
3.2	POM_4694	POM	Unk One	Ipomoea	Flowers	Waimanu	Hawaii	1
3.2	POM_4820	POM	Unk One	Ipomoea	Flowers	Waimanu	Hawaii	1
3.2	POM_596	POM	Unk One	Ipomoea	Flowers	Waimanu	Hawaii	1
3.3	POM_2587	POM	Unk One	Ipomoea	Flowers	Waimanu	Hawaii	1
3.3	POM_3023	POM	Unk One	Ipomoea	Flowers	Waimanu	Hawaii	1
3.3	POM_863	POM	Unk One	Ipomoea	Flowers	Waimanu	Hawaii	1
3.4	ELA_1842	ELA	D. elegans	Alpinia	Flowers	Taiwan	Taiwan	1
3.4	ELA_4511	ELA	D. elegans	Alpinia	Flowers	Taiwan	Taiwan	1
3.4	ELA_1037	ELA	D. elegans	Alpinia	Flowers	Taiwan	Taiwan	1
3.5	POM_4263	POM	Unk One	Ipomoea	Flowers	Waimanu	Hawaii	1
3.5	POM_2986	POM	Unk One	Ipomoea	Flowers	Waimanu	Hawaii	1
3.5	POM_1502	POM	Unk One	Ipomoea	Flowers	Waimanu	Hawaii	1
3.6	ICF_3833	ICF	D. immigrans	Citrus	Fruit	Wolfskill	North America	1
3.6	ICF_4430	ICF	D. immigrans	Citrus	Fruit	Wolfskill	North America	1
3.6	ICF_2801	ICF	D. immigrans	Citrus	Fruit	Wolfskill	North America	1
2.1	ELA_1181	ELA	D. elegans	Alpinia	Flowers	Taiwan	Taiwan	1
2.1	MEC_587	MEC	D. malerkotliana	Terminalia	Fruit	Seychelles	Africa	1
2.2	ANM_3916	ANM	D. ananassae	Morinda	Fruit	Captain Cook	Hawaii	1
2.2	TKM_1043	TKM	D. takahashii	Morinda	Fruit	Captain Cook	Hawaii	1
2.3	ICF_4871	ICF	D. immigrans	Citrus	Fruit	Wolfskill	North America	1
2.3	ICF_1156	ICF	D. immigrans	Citrus	Fruit	Wolfskill	North America	1
2.4	ELA_2393	ELA	D. elegans	Alpinia	Flowers	Taiwan	Taiwan	1
2.4	ELA_1235	ELA	D. elegans	Alpinia	Flowers	Taiwan	Taiwan	1
2.5	ICF_3902	ICF	D. immigrans	Citrus	Fruit	Wolfskill	North America	1
2.5	ICF_1250	ICF	D. immigrans	Citrus	Fruit	Wolfskill	North America	1
2.6	PON_4502	PON	Unk Two	Pandanus	Fruit	Waimanu	Hawaii	1
2.6	PON_1465	PON	Unk Two	Pandanus	Fruit	Waimanu	Hawaii	1
2.7	POM_3493	POM	Unk One	Ipomoea	Flowers	Waimanu	Hawaii	1
2.7	POM_1554	POM	Unk One	Ipomoea	Flowers	Waimanu	Hawaii	1
2.8	IMH_2752	IMH	D. sp. Affinis immigrans	Hibiscus	Flowers	Captain Cook	Hawaii	1
2.8	IMH_1602	IMH	D. sp. Affinis immigrans	Hibiscus	Flowers	Captain Cook	Hawaii	1
2.9	TKM_2031	TKM	D. takahashii	Morinda	Fruit	Captain Cook	Hawaii	1
2.9	TKM_1696	TKM	D. takahashii	Morinda	Fruit	Captain Cook	Hawaii	1
2.11	POM_3779	POM	Unk One	Ipomoea	Flowers	Waimanu	Hawaii	1
2.11	POM_1863	POM	Unk One	Ipomoea	Flowers	Waimanu	Hawaii	1
2.12	TKM_4246	TKM	D. takahashii	Morinda	Fruit	Captain Cook	Hawaii	1
2.12	TKM_1992	TKM	D. takahashii	Morinda	Fruit	Captain Cook	Hawaii	1
2.13	POM_2558	POM	Unk One	Ipomoea	Flowers	Waimanu	Hawaii	1
2.13	POM_1997	POM	Unk One	Ipomoea	Flowers	Waimanu	Hawaii	1
2.14	ICF_3173	ICF	D. immigrans	Citrus	Fruit	Wolfskill	North America	1
2.14	ICF_2059	ICF	D. immigrans	Citrus	Fruit	Wolfskill	North America	1
2.15	POM_4689	POM	Unk One	Ipomoea	Flowers	Waimanu	Hawaii	1
2.15	POM_2094	POM	Unk One	Ipomoea	Flowers	Waimanu	Hawaii	1
2.16	TKM_3510	TKM	D. takahashii	Morinda	Fruit	Captain Cook	Hawaii	1
2.16	TKM_2413	TKM	D. takahashii	Morinda	Fruit	Captain Cook	Hawaii	1
2.17	IMH_4547	IMH	D. sp. Affinis immigrans	Hibiscus	Flowers	Captain Cook	Hawaii	1
2.17	IMH_2971	IMH	D. sp. Affinis immigrans	Hibiscus	Flowers	Captain Cook	Hawaii	1
2.18	FNS_3828	FNS	D. falleni	Russula	Mushrooms	New York	North America	1
2.18	FNS_3076	FNS	D. falleni	Russula	Mushrooms	New York	North America	1
2.19	TKM_4195	TKM	D. takahashii	Morinda	Fruit	Captain Cook	Hawaii	1
2.19	TKM_3808	TKM	D. takahashii	Morinda	Fruit	Captain Cook	Hawaii	1
2.3	POM_4226	POM	Unk One	Ipomoea	Flowers	Waimanu	Hawaii	1
2.3	POM_4165	POM	Unk One	Ipomoea	Flowers	Waimanu	Hawaii	1
2.31	ANM_4321	ANM	D. ananassae	Morinda	Fruit	Captain Cook	Hawaii	1
2.31	TKM_4207	TKM	D. takahashii	Morinda	Fruit	Captain Cook	Hawaii	1
1.001	POM_28	POM	Unk One	Ipomoea	Flowers	Waimanu	Hawaii	1
1.002	ICF_72	ICF	D. immigrans	Citrus	Fruit	Wolfskill	North America	1
1.003	ELA_179	ELA	D. elegans	Alpinia	Flowers	Taiwan	Taiwan	1
1.004	IMH_182	IMH	D. sp. Affinis immigrans	Hibiscus	Flowers	Captain Cook	Hawaii	1
1.005	POM_185	POM	Unk One	Ipomoea	Flowers	Waimanu	Hawaii	1
1.006	POM_193	POM	Unk One	Ipomoea	Flowers	Waimanu	Hawaii	1
1.007	ICF_217	ICF	D. immigrans	Citrus	Fruit	Wolfskill	North America	1
1.008	ELA_218	ELA	D. elegans	Alpinia	Flowers	Taiwan	Taiwan	1
1.009	ICF_225	ICF	D. immigrans	Citrus	Fruit	Wolfskill	North America	1
1.01	TKM_232	TKM	D. takahashii	Morinda	Fruit	Captain Cook	Hawaii	1
1.011	MEC_275	MEC	D. malerkotliana	Terminalia	Fruit	Seychelles	Africa	1
1.012	ICF_287	ICF	D. immigrans	Citrus	Fruit	Wolfskill	North America	1
1.013	MOV_294	MOV	D. mojavensis	Agria	Cactus	Sonora	North America	1
1.014	ELA_300	ELA	D. elegans	Alpinia	Flowers	Taiwan	Taiwan	1
1.015	IMH_340	IMH	D. sp. Affinis immigrans	Hibiscus	Flowers	Captain Cook	Hawaii	1
1.016	TKM_356	TKM	D. takahashii	Morinda	Fruit	Captain Cook	Hawaii	1
1.017	POM_363	POM	Unk One	Ipomoea	Flowers	Waimanu	Hawaii	1
1.018	POM_389	POM	Unk One	Ipomoea	Flowers	Waimanu	Hawaii	1
1.019	MEC_421	MEC	D. malerkotliana	Terminalia	Fruit	Seychelles	Africa	1
1.02	TKM_456	TKM	D. takahashii	Morinda	Fruit	Captain Cook	Hawaii	1
1.021	POM_482	POM	Unk One	Ipomoea	Flowers	Waimanu	Hawaii	1
1.022	POM_500	POM	Unk One	Ipomoea	Flowers	Waimanu	Hawaii	1
1.023	ELA_505	ELA	D. elegans	Alpinia	Flowers	Taiwan	Taiwan	1
1.024	CAR_532	SCA	Scaptodros	Hibiscus	Flowers	Queensland	Australia	1
1.025	TKM_536	TKM	D. takahashii	Morinda	Fruit	Captain Cook	Hawaii	1
1.026	ELA_549	ELA	D. elegans	Alpinia	Flowers	Taiwan	Taiwan	1
1.027	PON_579	PON	Unk Two	Pandanus	Fruit	Waimanu	Hawaii	1
1.028	POM_581	POM	Unk One	Ipomoea	Flowers	Waimanu	Hawaii	1
1.029	NNS_602	NNS	D. neotestacea	Russula	Mushrooms	New York	North America	1
1.03	FNS_605	FNS	D. falleni	Russula	Mushrooms	New York	North America	1
1.031	TKM_635	TKM	D. takahashii	Morinda	Fruit	Captain Cook	Hawaii	1
1.032	TKM_644	TKM	D. takahashii	Morinda	Fruit	Captain Cook	Hawaii	1
1.033	ICF_662	ICF	D. immigrans	Citrus	Fruit	Wolfskill	North America	1
1.034	TKM_683	TKM	D. takahashii	Morinda	Fruit	Captain Cook	Hawaii	1
1.035	MOV_684	MOV	D. mojavensis	Agria	Cactus	Sonora	North America	1
1.036	TKM_723	TKM	D. takahashii	Morinda	Fruit	Captain Cook	Hawaii	1
1.037	ELA_736	ELA	D. elegans	Alpinia	Flowers	Taiwan	Taiwan	1
1.038	TKM_752	TKM	D. takahashii	Morinda	Fruit	Captain Cook	Hawaii	1
1.039	POM_755	POM	Unk One	Ipomoea	Flowers	Waimanu	Hawaii	1
1.04	ELA_783	ELA	D. elegans	Alpinia	Flowers	Taiwan	Taiwan	1
1.041	POM_795	POM	Unk One	Ipomoea	Flowers	Waimanu	Hawaii	1
1.042	MEC_799	MEC	D. malerkotliana	Terminalia	Fruit	Seychelles	Africa	1
1.043	TKM_817	TKM	D. takahashii	Morinda	Fruit	Captain Cook	Hawaii	1
1.044	IMH_849	IMH	D. sp. Affinis immigrans	Hibiscus	Flowers	Captain Cook	Hawaii	1
1.045	TKM_861	TKM	D. takahashii	Morinda	Fruit	Captain Cook	Hawaii	1
1.046	FNS_864	FNS	D. falleni	Russula	Mushrooms	New York	North America	1
1.047	MEC_888	MEC	D. malerkotliana	Terminalia	Fruit	Seychelles	Africa	1
1.048	MEC_895	MEC	D. malerkotliana	Terminalia	Fruit	Seychelles	Africa	1
1.049	POM_935	POM	Unk One	Ipomoea	Flowers	Waimanu	Hawaii	1
1.05	POM_938	POM	Unk One	Ipomoea	Flowers	Waimanu	Hawaii	1
1.051	TKM_944	TKM	D. takahashii	Morinda	Fruit	Captain Cook	Hawaii	1
1.052	IMH_967	IMH	D. sp. Affinis immigrans	Hibiscus	Flowers	Captain Cook	Hawaii	1
1.053	POM_990	POM	Unk One	Ipomoea	Flowers	Waimanu	Hawaii	1
1.054	IMH_1048	IMH	D. sp. Affinis immigrans	Hibiscus	Flowers	Captain Cook	Hawaii	1
1.055	MIC_1087	MIC	Microdros	Shelf	Mushrooms	Malaysia	Malaysia	1
1.056	IMH_1109	IMH	D. sp. Affinis immigrans	Hibiscus	Flowers	Captain Cook	Hawaii	1
1.057	POM_1118	POM	Unk One	Ipomoea	Flowers	Waimanu	Hawaii	1
1.058	IMH_1120	IMH	D. sp. Affinis immigrans	Hibiscus	Flowers	Captain Cook	Hawaii	1
1.059	IMH_1160	IMH	D. sp. Affinis immigrans	Hibiscus	Flowers	Captain Cook	Hawaii	1
1.06	TKM_1182	TKM	D. takahashii	Morinda	Fruit	Captain Cook	Hawaii	1
1.061	POM_1212	POM	Unk One	Ipomoea	Flowers	Waimanu	Hawaii	1
1.062	POM_1224	POM	Unk One	Ipomoea	Flowers	Waimanu	Hawaii	1
1.063	IMH_1233	IMH	D. sp. Affinis immigrans	Hibiscus	Flowers	Captain Cook	Hawaii	1
1.064	POM_1265	POM	Unk One	Ipomoea	Flowers	Waimanu	Hawaii	1
1.065	POM_1292	POM	Unk One	Ipomoea	Flowers	Waimanu	Hawaii	1
1.066	TKM_1293	TKM	D. takahashii	Morinda	Fruit	Captain Cook	Hawaii	1
1.067	TKM_1297	TKM	D. takahashii	Morinda	Fruit	Captain Cook	Hawaii	1
1.068	TKM_1306	TKM	D. takahashii	Morinda	Fruit	Captain Cook	Hawaii	1
1.069	TKM_1329	TKM	D. takahashii	Morinda	Fruit	Captain Cook	Hawaii	1
1.07	TKM_1360	TKM	D. takahashii	Morinda	Fruit	Captain Cook	Hawaii	1
1.071	IMH_1382	IMH	D. sp. Affinis immigrans	Hibiscus	Flowers	Captain Cook	Hawaii	1
1.072	TKM_1412	TKM	D. takahashii	Morinda	Fruit	Captain Cook	Hawaii	1
1.073	POM_1414	POM	Unk One	Ipomoea	Flowers	Waimanu	Hawaii	1
1.074	POM_1416	POM	Unk One	Ipomoea	Flowers	Waimanu	Hawaii	1
1.075	ICF_1440	ICF	D. immigrans	Citrus	Fruit	Wolfskill	North America	1
1.076	POM_1452	POM	Unk One	Ipomoea	Flowers	Waimanu	Hawaii	1
1.077	IMH_1475	IMH	D. sp. Affinis immigrans	Hibiscus	Flowers	Captain Cook	Hawaii	1
1.078	ANM_1479	ANM	D. ananassae	Morinda	Fruit	Captain Cook	Hawaii	1
1.079	POM_1493	POM	Unk One	Ipomoea	Flowers	Waimanu	Hawaii	1
1.08	POM_1535	POM	Unk One	Ipomoea	Flowers	Waimanu	Hawaii	1
1.081	POM_1546	POM	Unk One	Ipomoea	Flowers	Waimanu	Hawaii	1
1.082	IMH_1548	IMH	D. sp. Affinis immigrans	Hibiscus	Flowers	Captain Cook	Hawaii	1
1.083	ICF_1570	ICF	D. immigrans	Citrus	Fruit	Wolfskill	North America	1
1.084	ICF_1583	ICF	D. immigrans	Citrus	Fruit	Wolfskill	North America	1
1.085	IMH_1587	IMH	D. sp. Affinis immigrans	Hibiscus	Flowers	Captain Cook	Hawaii	1
1.086	POM_1588	POM	Unk One	Ipomoea	Flowers	Waimanu	Hawaii	1
1.087	IMH_1597	IMH	D. sp. Affinis immigrans	Hibiscus	Flowers	Captain Cook	Hawaii	1
1.088	TKM_1598	TKM	D. takahashii	Morinda	Fruit	Captain Cook	Hawaii	1
1.089	MOV_1639	MOV	D. mojavensis	Agria	Cactus	Sonora	North America	1
1.09	TKM_1655	TKM	D. takahashii	Morinda	Fruit	Captain Cook	Hawaii	1
1.091	POM_1672	POM	Unk One	Ipomoea	Flowers	Waimanu	Hawaii	1
1.092	IMH_1688	IMH	D. sp. Affinis immigrans	Hibiscus	Flowers	Captain Cook	Hawaii	1
1.093	MEC_1690	MEC	D. malerkotliana	Terminalia	Fruit	Seychelles	Africa	1
1.094	POM_1692	POM	Unk One	Ipomoea	Flowers	Waimanu	Hawaii	1
1.095	ICF_1716	ICF	D. immigrans	Citrus	Fruit	Wolfskill	North America	1
1.096	TKM_1727	TKM	D. takahashii	Morinda	Fruit	Captain Cook	Hawaii	1
1.097	ELD_1737	ELD	D. elegans	Brugmansia	Flowers	Taiwan	Taiwan	1
1.098	POM_1748	POM	Unk One	Ipomoea	Flowers	Waimanu	Hawaii	1
1.099	POM_1749	POM	Unk One	Ipomoea	Flowers	Waimanu	Hawaii	1
1.1	POM_1753	POM	Unk One	Ipomoea	Flowers	Waimanu	Hawaii	1
1.101	ELA_1762	ELA	D. elegans	Alpinia	Flowers	Taiwan	Taiwan	1
1.102	TKM_1771	TKM	D. takahashii	Morinda	Fruit	Captain Cook	Hawaii	1
1.103	TKM_1801	TKM	D. takahashii	Morinda	Fruit	Captain Cook	Hawaii	1
1.104	POM_1832	POM	Unk One	Ipomoea	Flowers	Waimanu	Hawaii	1
1.105	POM_1834	POM	Unk One	Ipomoea	Flowers	Waimanu	Hawaii	1
1.106	TKM_1845	TKM	D. takahashii	Morinda	Fruit	Captain Cook	Hawaii	1
1.107	POM_1848	POM	Unk One	Ipomoea	Flowers	Waimanu	Hawaii	1
1.108	POM_1869	POM	Unk One	Ipomoea	Flowers	Waimanu	Hawaii	1
1.109	TKM_1874	TKM	D. takahashii	Morinda	Fruit	Captain Cook	Hawaii	1
1.11	TKM_1880	TKM	D. takahashii	Morinda	Fruit	Captain Cook	Hawaii	1
1.111	TKM_1898	TKM	D. takahashii	Morinda	Fruit	Captain Cook	Hawaii	1
1.112	TKM_1941	TKM	D. takahashii	Morinda	Fruit	Captain Cook	Hawaii	1
1.113	TKM_1949	TKM	D. takahashii	Morinda	Fruit	Captain Cook	Hawaii	1
1.114	TKM_1959	TKM	D. takahashii	Morinda	Fruit	Captain Cook	Hawaii	1
1.115	POM_1962	POM	Unk One	Ipomoea	Flowers	Waimanu	Hawaii	1
1.116	FNS_1963	FNS	D. falleni	Russula	Mushrooms	New York	North America	1
1.117	ANM_1972	ANM	D. ananassae	Morinda	Fruit	Captain Cook	Hawaii	1
1.118	FNS_1991	FNS	D. falleni	Russula	Mushrooms	New York	North America	1
1.119	TKM_1998	TKM	D. takahashii	Morinda	Fruit	Captain Cook	Hawaii	1
1.12	TKM_1999	TKM	D. takahashii	Morinda	Fruit	Captain Cook	Hawaii	1
1.121	TKM_2015	TKM	D. takahashii	Morinda	Fruit	Captain Cook	Hawaii	1
1.122	ANM_2019	ANM	D. ananassae	Morinda	Fruit	Captain Cook	Hawaii	1
1.123	PON_2030	PON	Unk Two	Pandanus	Fruit	Waimanu	Hawaii	1
1.124	TKM_2046	TKM	D. takahashii	Morinda	Fruit	Captain Cook	Hawaii	1
1.125	TKM_2055	TKM	D. takahashii	Morinda	Fruit	Captain Cook	Hawaii	1
1.126	IMH_2056	IMH	D. sp. Affinis immigrans	Hibiscus	Flowers	Captain Cook	Hawaii	1
1.127	POM_2066	POM	Unk One	Ipomoea	Flowers	Waimanu	Hawaii	1
1.128	TKM_2071	TKM	D. takahashii	Morinda	Fruit	Captain Cook	Hawaii	1
1.129	ICF_2072	ICF	D. immigrans	Citrus	Fruit	Wolfskill	North America	1
1.13	IMH_2090	IMH	D. sp. Affinis immigrans	Hibiscus	Flowers	Captain Cook	Hawaii	1
1.131	TKM_2101	TKM	D. takahashii	Morinda	Fruit	Captain Cook	Hawaii	1
1.132	TKM_2102	TKM	D. takahashii	Morinda	Fruit	Captain Cook	Hawaii	1
1.133	TKM_2109	TKM	D. takahashii	Morinda	Fruit	Captain Cook	Hawaii	1
1.134	TKM_2121	TKM	D. takahashii	Morinda	Fruit	Captain Cook	Hawaii	1
1.135	POM_2129	POM	Unk One	Ipomoea	Flowers	Waimanu	Hawaii	1
1.136	ANM_2136	ANM	D. ananassae	Morinda	Fruit	Captain Cook	Hawaii	1
1.137	POM_2144	POM	Unk One	Ipomoea	Flowers	Waimanu	Hawaii	1
1.138	FNS_2163	FNS	D. falleni	Russula	Mushrooms	New York	North America	1
1.139	TKM_2220	TKM	D. takahashii	Morinda	Fruit	Captain Cook	Hawaii	1
1.14	POM_2226	POM	Unk One	Ipomoea	Flowers	Waimanu	Hawaii	1
1.141	POM_2232	POM	Unk One	Ipomoea	Flowers	Waimanu	Hawaii	1
1.142	TKM_2243	TKM	D. takahashii	Morinda	Fruit	Captain Cook	Hawaii	1
1.143	IMH_2263	IMH	D. sp. Affinis immigrans	Hibiscus	Flowers	Captain Cook	Hawaii	1
1.144	IMH_2267	IMH	D. sp. Affinis immigrans	Hibiscus	Flowers	Captain Cook	Hawaii	1
1.145	TKM_2276	TKM	D. takahashii	Morinda	Fruit	Captain Cook	Hawaii	1
1.146	ELA_2288	ELA	D. elegans	Alpinia	Flowers	Taiwan	Taiwan	1
1.147	TKM_2309	TKM	D. takahashii	Morinda	Fruit	Captain Cook	Hawaii	1
1.148	TKM_2310	TKM	D. takahashii	Morinda	Fruit	Captain Cook	Hawaii	1
1.149	SPP_2321	SPP	D. mel	Opuntia	Fruit	Arboretum	North America	1
1.15	POM_2322	POM	Unk One	Ipomoea	Flowers	Waimanu	Hawaii	1
1.151	TKM_2341	TKM	D. takahashii	Morinda	Fruit	Captain Cook	Hawaii	1
1.152	ELA_2342	ELA	D. elegans	Alpinia	Flowers	Taiwan	Taiwan	1
1.153	ICF_2353	ICF	D. immigrans	Citrus	Fruit	Wolfskill	North America	1
1.154	POM_2356	POM	Unk One	Ipomoea	Flowers	Waimanu	Hawaii	1
1.155	FNS_2363	FNS	D. falleni	Russula	Mushrooms	New York	North America	1
1.156	IMH_2367	IMH	D. sp. Affinis immigrans	Hibiscus	Flowers	Captain Cook	Hawaii	1
1.157	TKM_2376	TKM	D. takahashii	Morinda	Fruit	Captain Cook	Hawaii	1
1.158	ICF_2414	ICF	D. immigrans	Citrus	Fruit	Wolfskill	North America	1
1.159	POM_2436	POM	Unk One	Ipomoea	Flowers	Waimanu	Hawaii	1
1.16	POM_2443	POM	Unk One	Ipomoea	Flowers	Waimanu	Hawaii	1
1.161	ICF_2478	ICF	D. immigrans	Citrus	Fruit	Wolfskill	North America	1
1.162	TKM_2482	TKM	D. takahashii	Morinda	Fruit	Captain Cook	Hawaii	1
1.163	ELA_2490	ELA	D. elegans	Alpinia	Flowers	Taiwan	Taiwan	1
1.164	TKM_2509	TKM	D. takahashii	Morinda	Fruit	Captain Cook	Hawaii	1
1.165	POM_2520	POM	Unk One	Ipomoea	Flowers	Waimanu	Hawaii	1
1.166	TKM_2527	TKM	D. takahashii	Morinda	Fruit	Captain Cook	Hawaii	1
1.167	POM_2535	POM	Unk One	Ipomoea	Flowers	Waimanu	Hawaii	1
1.168	ICF_2544	ICF	D. immigrans	Citrus	Fruit	Wolfskill	North America	1
1.169	POM_2559	POM	Unk One	Ipomoea	Flowers	Waimanu	Hawaii	1
1.17	POM_2592	POM	Unk One	Ipomoea	Flowers	Waimanu	Hawaii	1
1.171	IMH_2596	IMH	D. sp. Affinis immigrans	Hibiscus	Flowers	Captain Cook	Hawaii	1
1.172	TKM_2620	TKM	D. takahashii	Morinda	Fruit	Captain Cook	Hawaii	1
1.173	TKM_2647	TKM	D. takahashii	Morinda	Fruit	Captain Cook	Hawaii	1
1.174	ICF_2659	ICF	D. immigrans	Citrus	Fruit	Wolfskill	North America	1
1.175	POM_2671	POM	Unk One	Ipomoea	Flowers	Waimanu	Hawaii	1
1.176	TKM_2693	TKM	D. takahashii	Morinda	Fruit	Captain Cook	Hawaii	1
1.177	TKM_2694	TKM	D. takahashii	Morinda	Fruit	Captain Cook	Hawaii	1
1.178	ICF_2695	ICF	D. immigrans	Citrus	Fruit	Wolfskill	North America	1
1.179	TKM_2700	TKM	D. takahashii	Morinda	Fruit	Captain Cook	Hawaii	1
1.18	TKM_2712	TKM	D. takahashii	Morinda	Fruit	Captain Cook	Hawaii	1
1.181	TKM_2713	TKM	D. takahashii	Morinda	Fruit	Captain Cook	Hawaii	1
1.182	TKM_2723	TKM	D. takahashii	Morinda	Fruit	Captain Cook	Hawaii	1
1.183	ANM_2724	ANM	D. ananassae	Morinda	Fruit	Captain Cook	Hawaii	1
1.184	ANM_2755	ANM	D. ananassae	Morinda	Fruit	Captain Cook	Hawaii	1
1.185	POM_2761	POM	Unk One	Ipomoea	Flowers	Waimanu	Hawaii	1
1.186	FNS_2773	FNS	D. falleni	Russula	Mushrooms	New York	North America	1
1.187	ICF_2810	ICF	D. immigrans	Citrus	Fruit	Wolfskill	North America	1
1.188	TKM_2835	TKM	D. takahashii	Morinda	Fruit	Captain Cook	Hawaii	1
1.189	FNS_2841	FNS	D. falleni	Russula	Mushrooms	New York	North America	1
1.19	ICF_2845	ICF	D. immigrans	Citrus	Fruit	Wolfskill	North America	1
1.191	POM_2854	POM	Unk One	Ipomoea	Flowers	Waimanu	Hawaii	1
1.192	IMH_2876	IMH	D. sp. Affinis immigrans	Hibiscus	Flowers	Captain Cook	Hawaii	1
1.193	MEC_2877	MEC	D. malerkotliana	Terminalia	Fruit	Seychelles	Africa	1
1.194	POM_2900	POM	Unk One	Ipomoea	Flowers	Waimanu	Hawaii	1
1.195	POM_2912	POM	Unk One	Ipomoea	Flowers	Waimanu	Hawaii	1
1.196	MEC_2933	MEC	D. malerkotliana	Terminalia	Fruit	Seychelles	Africa	1
1.197	POM_2963	POM	Unk One	Ipomoea	Flowers	Waimanu	Hawaii	1
1.198	IMH_2972	IMH	D. sp. Affinis immigrans	Hibiscus	Flowers	Captain Cook	Hawaii	1
1.199	ELA_2976	ELA	D. elegans	Alpinia	Flowers	Taiwan	Taiwan	1
1.2	POM_2983	POM	Unk One	Ipomoea	Flowers	Waimanu	Hawaii	1
1.201	MEC_2987	MEC	D. malerkotliana	Terminalia	Fruit	Seychelles	Africa	1
1.202	TKM_2995	TKM	D. takahashii	Morinda	Fruit	Captain Cook	Hawaii	1
1.203	TKM_3007	TKM	D. takahashii	Morinda	Fruit	Captain Cook	Hawaii	1
1.204	TKM_3008	TKM	D. takahashii	Morinda	Fruit	Captain Cook	Hawaii	1
1.205	MEC_3011	MEC	D. malerkotliana	Terminalia	Fruit	Seychelles	Africa	1
1.206	ELA_3013	ELA	D. elegans	Alpinia	Flowers	Taiwan	Taiwan	1
1.207	ELA_3020	ELA	D. elegans	Alpinia	Flowers	Taiwan	Taiwan	1
1.208	TKM_3024	TKM	D. takahashii	Morinda	Fruit	Captain Cook	Hawaii	1
1.209	POM_3036	POM	Unk One	Ipomoea	Flowers	Waimanu	Hawaii	1
1.21	IMH_3037	IMH	D. sp. Affinis immigrans	Hibiscus	Flowers	Captain Cook	Hawaii	1
1.211	ICF_3050	ICF	D. immigrans	Citrus	Fruit	Wolfskill	North America	1
1.212	IMH_3053	IMH	D. sp. Affinis immigrans	Hibiscus	Flowers	Captain Cook	Hawaii	1
1.213	IMH_3064	IMH	D. sp. Affinis immigrans	Hibiscus	Flowers	Captain Cook	Hawaii	1
1.214	TKM_3066	TKM	D. takahashii	Morinda	Fruit	Captain Cook	Hawaii	1
1.215	TKM_3093	TKM	D. takahashii	Morinda	Fruit	Captain Cook	Hawaii	1
1.216	IMH_3101	IMH	D. sp. Affinis immigrans	Hibiscus	Flowers	Captain Cook	Hawaii	1
1.217	TKM_3106	TKM	D. takahashii	Morinda	Fruit	Captain Cook	Hawaii	1
1.218	ICF_3109	ICF	D. immigrans	Citrus	Fruit	Wolfskill	North America	1
1.219	TKM_3111	TKM	D. takahashii	Morinda	Fruit	Captain Cook	Hawaii	1
1.22	TKM_3132	TKM	D. takahashii	Morinda	Fruit	Captain Cook	Hawaii	1
1.221	TKM_3151	TKM	D. takahashii	Morinda	Fruit	Captain Cook	Hawaii	1
1.222	TKM_3164	TKM	D. takahashii	Morinda	Fruit	Captain Cook	Hawaii	1
1.223	CAR_3171	SCA	Scaptodros	Hibiscus	Flowers	Queensland	Australia	1
1.224	ELA_3174	ELA	D. elegans	Alpinia	Flowers	Taiwan	Taiwan	1
1.225	MOV_3177	MOV	D. mojavensis	Agria	Cactus	Sonora	North America	1
1.226	POM_3184	POM	Unk One	Ipomoea	Flowers	Waimanu	Hawaii	1
1.227	TKM_3191	TKM	D. takahashii	Morinda	Fruit	Captain Cook	Hawaii	1
1.228	TKM_3212	TKM	D. takahashii	Morinda	Fruit	Captain Cook	Hawaii	1
1.229	TKM_3221	TKM	D. takahashii	Morinda	Fruit	Captain Cook	Hawaii	1
1.23	TKM_3244	TKM	D. takahashii	Morinda	Fruit	Captain Cook	Hawaii	1
1.231	POM_3254	POM	Unk One	Ipomoea	Flowers	Waimanu	Hawaii	1
1.232	POM_3262	POM	Unk One	Ipomoea	Flowers	Waimanu	Hawaii	1
1.233	ANM_3279	ANM	D. ananassae	Morinda	Fruit	Captain Cook	Hawaii	1
1.234	POM_3291	POM	Unk One	Ipomoea	Flowers	Waimanu	Hawaii	1
1.235	TKM_3307	TKM	D. takahashii	Morinda	Fruit	Captain Cook	Hawaii	1
1.236	TKM_3334	TKM	D. takahashii	Morinda	Fruit	Captain Cook	Hawaii	1
1.237	POM_3339	POM	Unk One	Ipomoea	Flowers	Waimanu	Hawaii	1
1.238	MOV_3343	MOV	D. mojavensis	Agria	Cactus	Sonora	North America	1
1.239	POM_3345	POM	Unk One	Ipomoea	Flowers	Waimanu	Hawaii	1
1.24	TKM_3351	TKM	D. takahashii	Morinda	Fruit	Captain Cook	Hawaii	1
1.241	POM_3356	POM	Unk One	Ipomoea	Flowers	Waimanu	Hawaii	1
1.242	ELA_3357	ELA	D. elegans	Alpinia	Flowers	Taiwan	Taiwan	1
1.243	TKM_3368	TKM	D. takahashii	Morinda	Fruit	Captain Cook	Hawaii	1
1.244	IMH_3369	IMH	D. sp. Affinis immigrans	Hibiscus	Flowers	Captain Cook	Hawaii	1
1.245	MEC_3378	MEC	D. malerkotliana	Terminalia	Fruit	Seychelles	Africa	1
1.246	ANM_3397	ANM	D. ananassae	Morinda	Fruit	Captain Cook	Hawaii	1
1.247	TKM_3424	TKM	D. takahashii	Morinda	Fruit	Captain Cook	Hawaii	1
1.248	MOV_3463	MOV	D. mojavensis	Agria	Cactus	Sonora	North America	1
1.249	IMH_3467	IMH	D. sp. Affinis immigrans	Hibiscus	Flowers	Captain Cook	Hawaii	1
1.25	ELA_3471	ELA	D. elegans	Alpinia	Flowers	Taiwan	Taiwan	1
1.251	TKM_3483	TKM	D. takahashii	Morinda	Fruit	Captain Cook	Hawaii	1
1.252	TKM_3501	TKM	D. takahashii	Morinda	Fruit	Captain Cook	Hawaii	1
1.253	POM_3511	POM	Unk One	Ipomoea	Flowers	Waimanu	Hawaii	1
1.254	TKM_3538	TKM	D. takahashii	Morinda	Fruit	Captain Cook	Hawaii	1
1.255	TKM_3541	TKM	D. takahashii	Morinda	Fruit	Captain Cook	Hawaii	1
1.256	TKM_3560	TKM	D. takahashii	Morinda	Fruit	Captain Cook	Hawaii	1
1.257	TKM_3610	TKM	D. takahashii	Morinda	Fruit	Captain Cook	Hawaii	1
1.258	TKM_3620	TKM	D. takahashii	Morinda	Fruit	Captain Cook	Hawaii	1
1.259	POM_3658	POM	Unk One	Ipomoea	Flowers	Waimanu	Hawaii	1
1.26	POM_3659	POM	Unk One	Ipomoea	Flowers	Waimanu	Hawaii	1
1.261	TKM_3662	TKM	D. takahashii	Morinda	Fruit	Captain Cook	Hawaii	1
1.262	TKM_3663	TKM	D. takahashii	Morinda	Fruit	Captain Cook	Hawaii	1
1.263	POM_3666	POM	Unk One	Ipomoea	Flowers	Waimanu	Hawaii	1
1.264	POM_3677	POM	Unk One	Ipomoea	Flowers	Waimanu	Hawaii	1
1.265	ELD_3682	ELD	D. elegans	Brugmansia	Flowers	Taiwan	Taiwan	1
1.266	TKM_3716	TKM	D. takahashii	Morinda	Fruit	Captain Cook	Hawaii	1
1.267	TKM_3725	TKM	D. takahashii	Morinda	Fruit	Captain Cook	Hawaii	1
1.268	TKM_3727	TKM	D. takahashii	Morinda	Fruit	Captain Cook	Hawaii	1
1.269	ICF_3731	ICF	D. immigrans	Citrus	Fruit	Wolfskill	North America	1
1.27	IMH_3738	IMH	D. sp. Affinis immigrans	Hibiscus	Flowers	Captain Cook	Hawaii	1
1.271	POM_3744	POM	Unk One	Ipomoea	Flowers	Waimanu	Hawaii	1
1.272	MEC_3758	MEC	D. malerkotliana	Terminalia	Fruit	Seychelles	Africa	1
1.273	ELA_3759	ELA	D. elegans	Alpinia	Flowers	Taiwan	Taiwan	1
1.274	MEC_3765	MEC	D. malerkotliana	Terminalia	Fruit	Seychelles	Africa	1
1.275	POM_3776	POM	Unk One	Ipomoea	Flowers	Waimanu	Hawaii	1
1.276	FNS_3784	FNS	D. falleni	Russula	Mushrooms	New York	North America	1
1.277	ICF_3810	ICF	D. immigrans	Citrus	Fruit	Wolfskill	North America	1
1.278	MEC_3816	MEC	D. malerkotliana	Terminalia	Fruit	Seychelles	Africa	1
1.279	FNS_3819	FNS	D. falleni	Russula	Mushrooms	New York	North America	1
1.28	MIC_3830	MIC	Microdros	Shelf	Mushrooms	Malaysia	Malaysia	1
1.281	TKM_3832	TKM	D. takahashii	Morinda	Fruit	Captain Cook	Hawaii	1
1.282	POM_3835	POM	Unk One	Ipomoea	Flowers	Waimanu	Hawaii	1
1.283	POM_3843	POM	Unk One	Ipomoea	Flowers	Waimanu	Hawaii	1
1.284	TKM_3846	TKM	D. takahashii	Morinda	Fruit	Captain Cook	Hawaii	1
1.285	POM_3860	POM	Unk One	Ipomoea	Flowers	Waimanu	Hawaii	1
1.286	POM_3863	POM	Unk One	Ipomoea	Flowers	Waimanu	Hawaii	1
1.287	TKM_3864	TKM	D. takahashii	Morinda	Fruit	Captain Cook	Hawaii	1
1.288	ELA_3871	ELA	D. elegans	Alpinia	Flowers	Taiwan	Taiwan	1
1.289	ANM_3873	ANM	D. ananassae	Morinda	Fruit	Captain Cook	Hawaii	1
1.29	ICF_3877	ICF	D. immigrans	Citrus	Fruit	Wolfskill	North America	1
1.291	MEC_3890	MEC	D. malerkotliana	Terminalia	Fruit	Seychelles	Africa	1
1.292	MOV_3893	MOV	D. mojavensis	Agria	Cactus	Sonora	North America	1
1.293	ELA_3910	ELA	D. elegans	Alpinia	Flowers	Taiwan	Taiwan	1
1.294	CAR_3921	SCA	Scaptodros	Hibiscus	Flowers	Queensland	Australia	1
1.295	ELA_3926	ELA	D. elegans	Alpinia	Flowers	Taiwan	Taiwan	1
1.296	POM_3972	POM	Unk One	Ipomoea	Flowers	Waimanu	Hawaii	1
1.297	IMH_3978	IMH	D. sp. Affinis immigrans	Hibiscus	Flowers	Captain Cook	Hawaii	1
1.298	TKM_3996	TKM	D. takahashii	Morinda	Fruit	Captain Cook	Hawaii	1
1.299	TKM_4000	TKM	D. takahashii	Morinda	Fruit	Captain Cook	Hawaii	1
1.3	TKM_4010	TKM	D. takahashii	Morinda	Fruit	Captain Cook	Hawaii	1
1.301	TKM_4031	TKM	D. takahashii	Morinda	Fruit	Captain Cook	Hawaii	1
1.302	POM_4032	POM	Unk One	Ipomoea	Flowers	Waimanu	Hawaii	1
1.303	POM_4040	POM	Unk One	Ipomoea	Flowers	Waimanu	Hawaii	1
1.304	TKM_4058	TKM	D. takahashii	Morinda	Fruit	Captain Cook	Hawaii	1
1.305	ELA_4067	ELA	D. elegans	Alpinia	Flowers	Taiwan	Taiwan	1
1.306	TKM_4116	TKM	D. takahashii	Morinda	Fruit	Captain Cook	Hawaii	1
1.307	ELA_4135	ELA	D. elegans	Alpinia	Flowers	Taiwan	Taiwan	1
1.308	ANM_4168	ANM	D. ananassae	Morinda	Fruit	Captain Cook	Hawaii	1
1.309	POM_4174	POM	Unk One	Ipomoea	Flowers	Waimanu	Hawaii	1
1.31	MEC_4186	MEC	D. malerkotliana	Terminalia	Fruit	Seychelles	Africa	1
1.311	POM_4238	POM	Unk One	Ipomoea	Flowers	Waimanu	Hawaii	1
1.312	ICF_4251	ICF	D. immigrans	Citrus	Fruit	Wolfskill	North America	1
1.313	MEC_4288	MEC	D. malerkotliana	Terminalia	Fruit	Seychelles	Africa	1
1.314	ICF_4289	ICF	D. immigrans	Citrus	Fruit	Wolfskill	North America	1
1.315	POM_4292	POM	Unk One	Ipomoea	Flowers	Waimanu	Hawaii	1
1.316	IMH_4299	IMH	D. sp. Affinis immigrans	Hibiscus	Flowers	Captain Cook	Hawaii	1
1.317	POM_4302	POM	Unk One	Ipomoea	Flowers	Waimanu	Hawaii	1
1.318	POM_4308	POM	Unk One	Ipomoea	Flowers	Waimanu	Hawaii	1
1.319	IMH_4309	IMH	D. sp. Affinis immigrans	Hibiscus	Flowers	Captain Cook	Hawaii	1
1.32	POM_4313	POM	Unk One	Ipomoea	Flowers	Waimanu	Hawaii	1
1.321	TKM_4322	TKM	D. takahashii	Morinda	Fruit	Captain Cook	Hawaii	1
1.322	POM_4340	POM	Unk One	Ipomoea	Flowers	Waimanu	Hawaii	1
1.323	TKM_4348	TKM	D. takahashii	Morinda	Fruit	Captain Cook	Hawaii	1
1.324	TKM_4357	TKM	D. takahashii	Morinda	Fruit	Captain Cook	Hawaii	1
1.325	POM_4382	POM	Unk One	Ipomoea	Flowers	Waimanu	Hawaii	1
1.326	TKM_4397	TKM	D. takahashii	Morinda	Fruit	Captain Cook	Hawaii	1
1.327	IMH_4421	IMH	D. sp. Affinis immigrans	Hibiscus	Flowers	Captain Cook	Hawaii	1
1.328	POM_4447	POM	Unk One	Ipomoea	Flowers	Waimanu	Hawaii	1
1.329	TKM_4454	TKM	D. takahashii	Morinda	Fruit	Captain Cook	Hawaii	1
1.33	POM_4486	POM	Unk One	Ipomoea	Flowers	Waimanu	Hawaii	1
1.331	ICF_4513	ICF	D. immigrans	Citrus	Fruit	Wolfskill	North America	1
1.332	TKM_4521	TKM	D. takahashii	Morinda	Fruit	Captain Cook	Hawaii	1
1.333	TKM_4531	TKM	D. takahashii	Morinda	Fruit	Captain Cook	Hawaii	1
1.334	TKM_4534	TKM	D. takahashii	Morinda	Fruit	Captain Cook	Hawaii	1
1.335	TKM_4535	TKM	D. takahashii	Morinda	Fruit	Captain Cook	Hawaii	1
1.336	IMH_4570	IMH	D. sp. Affinis immigrans	Hibiscus	Flowers	Captain Cook	Hawaii	1
1.337	ICF_4574	ICF	D. immigrans	Citrus	Fruit	Wolfskill	North America	1
1.338	ICF_4591	ICF	D. immigrans	Citrus	Fruit	Wolfskill	North America	1
1.339	TKM_4597	TKM	D. takahashii	Morinda	Fruit	Captain Cook	Hawaii	1
1.34	MOV_4620	MOV	D. mojavensis	Agria	Cactus	Sonora	North America	1
1.341	POM_4630	POM	Unk One	Ipomoea	Flowers	Waimanu	Hawaii	1
1.342	IMH_4645	IMH	D. sp. Affinis immigrans	Hibiscus	Flowers	Captain Cook	Hawaii	1
1.343	TKM_4651	TKM	D. takahashii	Morinda	Fruit	Captain Cook	Hawaii	1
1.344	POM_4659	POM	Unk One	Ipomoea	Flowers	Waimanu	Hawaii	1
1.345	ELA_4668	ELA	D. elegans	Alpinia	Flowers	Taiwan	Taiwan	1
1.346	ELA_4678	ELA	D. elegans	Alpinia	Flowers	Taiwan	Taiwan	1
1.347	POM_4679	POM	Unk One	Ipomoea	Flowers	Waimanu	Hawaii	1
1.348	IMH_4690	IMH	D. sp. Affinis immigrans	Hibiscus	Flowers	Captain Cook	Hawaii	1
1.349	TKM_4692	TKM	D. takahashii	Morinda	Fruit	Captain Cook	Hawaii	1
1.35	IMH_4706	IMH	D. sp. Affinis immigrans	Hibiscus	Flowers	Captain Cook	Hawaii	1
1.351	ICF_4712	ICF	D. immigrans	Citrus	Fruit	Wolfskill	North America	1
1.352	POM_4718	POM	Unk One	Ipomoea	Flowers	Waimanu	Hawaii	1
1.353	MIC_4724	MIC	Microdros	Shelf	Mushrooms	Malaysia	Malaysia	1
1.354	TKM_4755	TKM	D. takahashii	Morinda	Fruit	Captain Cook	Hawaii	1
1.355	MOV_4758	MOV	D. mojavensis	Agria	Cactus	Sonora	North America	1
1.356	TKM_4787	TKM	D. takahashii	Morinda	Fruit	Captain Cook	Hawaii	1
1.357	POM_4803	POM	Unk One	Ipomoea	Flowers	Waimanu	Hawaii	1
1.358	POM_4804	POM	Unk One	Ipomoea	Flowers	Waimanu	Hawaii	1
1.359	MIC_4813	MIC	Microdros	Shelf	Mushrooms	Malaysia	Malaysia	1
1.36	POM_4821	POM	Unk One	Ipomoea	Flowers	Waimanu	Hawaii	1
1.361	IMH_4834	IMH	D. sp. Affinis immigrans	Hibiscus	Flowers	Captain Cook	Hawaii	1
1.362	IMH_4839	IMH	D. sp. Affinis immigrans	Hibiscus	Flowers	Captain Cook	Hawaii	1
1.363	IMH_4851	IMH	D. sp. Affinis immigrans	Hibiscus	Flowers	Captain Cook	Hawaii	1
1.364	ICF_4872	ICF	D. immigrans	Citrus	Fruit	Wolfskill	North America	1
1.365	FNS_4878	FNS	D. falleni	Russula	Mushrooms	New York	North America	1
