# Supplementary material for: Discovery of Trypanosomatid Parasites in Globally Distributed Drosophila Species
Source: PLoS One. 2013 Apr 29;8(4):e61937. doi: 10.1371/journal.pone.0061937 (PMC3639215; doi:10.1371/journal.pone.0061937)
Supplement: Dataset S5 — Accession numbers. (XLSX) [file pone.0061937.s005.xlsx]

## Sheet: Sheet1
Accession numbers of taxa used in Figure 1
Herpetomonas roitmani	AF038026
Endotrypanum monterogeii	L19407
Leishmania donovani	L19408
Phytomonas sp.	L19410
Trypanosoma cruzi	L22334
Trypanosoma cruzi	L19411
Leptomonas sp.	L19409
Trypanosoma brucei	X14553
Trypanosoma congolense	U22317
Trypanosoma simiae	U22320
Crithidia fasciculata	Y00055
Trypanosoma grosi	AB175622
Trypanosoma otospermophili	AB175625
Trypanosoma kuseli	AB175626
Trypanosoma minasense	AB362411
Bodo saltans	EF681898
Accession numbers of taxa used in Figure 2
Bodo saltans	AF208889
Wallaceina inconstans	AF153044
Trypanosoma scelopori	U67182
Trypanosoma cruzi	JN942610
Trypanosoma brucei	AJ009142
Trypanosoma avium	U39578
Sergeia podlipaevi	DQ394362
Leptomonas podlipaevi	DQ383649
Leptomonas jaculum	EF184218
Leptomonas collosoma	AF153038
Leptomonas barvae	FJ968532
Leptomonas acus	DQ910923
Leishmania major	X53915
Leishmania donovani	X07773
Leishmania aethiopica	GQ920678
Herpetomonas ztiplika	AF416560
Herpetomonas roitmani	AF038023
Herpetomonas muscarum	L18872
Herpetomonas mariadeanei	U01013
Endotrypanum monterogeii	X53911
Crithidia oncopelti	AF038025
Crithidia fasciculata	Y00055
Crithidia bombi	FN546181
Blastocrithidia triatoma	AF153037
Blastocrithidia largi	FJ968531
Blastocrithidia culicis	U05679
Trypanosomatidae sp. G42	JQ658831
Trypanosomatidae sp. G30	JQ658820
Trypanosomatidae sp. Eva	AF071866
Phytomonas sp. HART1	L35076
Phytomonas sp. EM1	AF016322
Phytomomas serpens 1G	AF016323
